# Supplementary material for: Structure-function covariation with nonfeeding ecological variables influences evolution of feeding specialization in Carnivora
Source: PubMed Central journal article supplement — Sci Adv. 2018 Feb 7;4(2):eaao5441. doi: 10.1126/sciadv.aao5441 (PMC5810607; doi:10.1126/sciadv.aao5441), 2018-02-07
Supplement: aao5441_SM.pdf [file aao5441_SM.pdf]

## Supplementary Materials for **Structure-function covariation with nonfeeding ecological variables influences evolution of feeding specialization in Carnivora**

Z. Jack Tseng and John J. Flynn

Published 7 February 2018, *Sci. Adv.* **4**, eaao5441 (2018)

DOI: 10.1126/sciadv.aao5441

### **This PDF file includes:**

- Additional Methodological Details and Results
- table S1. List of specimens used in the study.
- table S2. List of anatomical landmarks and semilandmarks used in the GMM analyses.
- table S3. Ecological attributes of species analyzed.
- table S4. Summary of sensitivity analyses of PGLS regression using different phylogenetic tree topology and branch length configurations.
- table S5. Area and volume attributes of the theoretical morphed models analyzed.
- table S6. Output values of FE simulations in the “bending test” analysis.
- table S7. Output values of FE simulations in the “temporalis-driven” analysis.
- table S8. Output values of FE simulations in the “masseter-driven” analysis.
- table S9. List of the highest mechanical demands from food items experienced by each carnivoran species, ranked on the basis of stiffness and density.
- fig. S1. Anatomical landmarks used in the GMM analyses.
- fig. S2. Main analysis.
- fig. S3. Sensitivity analysis 1.
- fig. S4. Sensitivity analysis 2.
- fig. S5. Sensitivity analysis 3.
- fig. S6. Sensitivity analysis 4.
- fig. S7. Sensitivity analysis 5.
- fig. S8. Sensitivity analysis 6.
- fig. S9. Sensitivity analysis 7.
- fig. S10. Sensitivity analysis 8.
- fig. S11. Sensitivity analysis 9.

- fig. S12. Contour plot of the first two PC axes against life history and environmental variables.
- fig. S13. 3D plots of PC scores of cranial shape data.
- fig. S14. Plot of mean annual precipitation versus mean annual temperature of species studied.
- References (69–72)

## Additional Methodological Details and Results

### 1. Branch length and tree topology sensitivity analyses for phylogenetic comparative analyses.

The tree topology and branch length configurations assessed in the sensitivity analyses are as follows:

- Main Analysis (Table 1): Based on tree topology of (61); uniform branch lengths.
- Sensitivity Analysis 1: Tree topology as in Main Analysis, but with euplerid polytomy resolved according to (69); uniform branch lengths.
- Sensitivity Analysis 2: Tree topology as in Main Analysis; fossil calibrations and branch lengths using data from (62), unpublished data from JJF and J. Finarelli, and PBDB (Paleobiology Database) (71); no age/node interpolations, so contains some zero branch lengths (same estimated divergence ages at adjacent nodes, when the oldest age calibration fossils for a clade occur in later-diverging nodes/lineages; all other nodes collapsed to the nearest older node with a fossil calibration age).
- Sensitivity Analysis 3: As in Sensitivity Analysis 2, but without PBDB node calibration data; no age/node interpolation, so contains some zero branch lengths.
- Sensitivity Analysis 4: As in Sensitivity Analysis 2, but with age/node interpolations (expanded by interpolating node ages in equal intervals along the branches between nodes previously having the same fossil-calibration ages, using the oldest and youngest bracketing ages).
- Sensitivity Analysis 5: As in Sensitivity Analysis 2, adding Meredith *et al.* (70) fossil calibrations (with priority to those, if in conflict with calibrations used in Sensitivity Analysis 2); with age/node interpolations.
- Sensitivity Analysis 6: Main Analysis tree topology; only Meredith *et al.* fossil calibrations; no age/node interpolations.
- Sensitivity Analysis 7: Main Analysis tree topology; only Meredith *et al.* fossil calibrations; with age/node interpolations.
- Sensitivity Analysis 8: Main Analysis tree topology; only Meredith *et al.* interfamilial molecular clock node age estimates (no direct fossil calibrations, although the Meredith *et al.* clock estimates rely on various fossil calibrations to derive the tree-wide nodal age estimates); no age/node interpolations.
- Sensitivity Analysis 9: Main Analysis tree topology; only Meredith *et al.* interfamilial molecular clock node age estimates; with age/node interpolations.

### 2. Comparisons of PGLS regression analyses between Main Analysis and Sensitivity Analyses (significance at $p \leq 0.05$ ).

- **Sensitivity Analysis 1** compared to Main Analysis:
  - a) lost significance in feeding ecology correlations for Carnivora (FE1 [dietary breadth] and FE1+2 [dietary breadth + trophic level]).
  - b) lost significance in Feliformia FE2 only.
  - c) gained significance in Carnivora and Feliformia EV1 (mean precipitation).
  - d) retained significance in Carnivora GMM/CS (cranial centroid size), FE2 (trophic level; significant only when herbivore species included), and LH2 (age at sexual maturity); in Caniformia LH2; and in Feliformia GMM/CS, and FE1 (significant only between narrow and broad ecology species) and FE1+2.
- **Sensitivity Analysis 2** compared to Main Analysis:
  - a) lost significance in Carnivora GMM/CS, and LH2.

- b) lost significance in Caniformia LH2.
  - c) lost significance in Feliformia GMM/CS, FE1, and FE1+2.
  - d) retained significance in Carnivora FE1, FE2, and FE1+2; and in Feliformia FE2.
- **Sensitivity Analysis 3** differs from Main Analysis in:
  - a) lost significance in Carnivora FE1, FE2, and FE1+2; and LH2.
  - b) lost significance in Caniformia LH2.
  - c) gained significance in Feliformia EV1 and EV1+2 (mean precipitation + mean temperature).
  - d) retained significance in Carnivora GMM/CS; and in Feliformia GMM/CS, FE1, FE2, and FE1+FE2.
- **Sensitivity Analysis 4** differs from Main Analysis in:
  - a) lost significance in Carnivora FE1, FE2, and FE1+2.
  - b) lost significance in Caniformia LH2.
  - c) retained significance in Carnivora GMM/CS; and in Feliformia GMM/CS, FE1, FE2, and FE1+2.
- **Sensitivity Analysis 5** differs from Main Analysis in:
  - a) lost significance in Carnivora FE1, FE2, and FE1+2, and LH2.
  - b) lost significance in Caniformia LH2.
  - c) lost significance in Feliformia GMM/CS.
  - d) retained significance in Carnivora GMM/CS; and in Feliformia FE1, FE2, and FE1+2.
- **Sensitivity Analysis 6** differs from Main Analysis in:
  - a) lost significance in Carnivora LH2.
  - b) lost significance in Caniformia LH2.
  - c) gained significance in Carnivora EV1 and EV1+2.
  - d) gained significance in Feliformia EV1 and EV1+2.
  - e) retained significance in Carnivora and Feliformia GMM/CS, FE1, FE2, and FE1+2.
- **Sensitivity Analysis 7** differs from Main Analysis in:
  - a) lost significance in Carnivora FE1 and FE2, and LH2.
  - b) lost significance in Caniformia LH2.
  - c) retained significance in Carnivora GMM/CS, and FE1+2; and in Feliformia GMM/CS, FE1, FE2, and FE1+2.
- **Sensitivity Analysis 8** differs from Main Analysis in:
  - a) lost significance in Carnivora LH2.
  - b) lost significance in Caniformia LH2.
  - c) gained significance in Carnivora EV1 and EV1+2.
  - d) gained significance in Feliformia EV1 and EV1+2.
  - e) retained significance in Carnivora and Feliformia GMM/CS, FE1, FE2, and FE1+2.
- **Sensitivity Analysis 9** differs from Main Analysis in:
  - a) lost significance in Carnivora FE1 and FE2, and LH2.
  - b) lost significance in Caniformia LH2.
  - c) retained significance in Carnivora GMM/CS and FE1+2; and in Feliformia GMM/CS, FE1, FE2, and FE1+2.

**table S1. List of specimens used in the study.** Abbreviations: AMNH, American Museum of Natural history; CMNH, Cleveland Museum of Natural History; LACM, Natural History Museum of Los Angeles County; MVZ, Museum of Vertebrate Zoology, University of California; SAM, South African Museum (Iziko Museums); USNM, National Museum of Natural History (Smithsonian Institution). For specimens used in previous publications, see methods section of main text.

| Taxon                         | Specimen Number or Publication       |
|-------------------------------|--------------------------------------|
| <i>Acinonyx_jubatus</i>       | AMNH FM 145071                       |
| <i>Ailuropoda_melanoleuca</i> | Figueirido <i>et al.</i> (2014) (30) |
| <i>Ailurus_fulgens</i>        | AMNH 185346                          |
| <i>Aonyx_capensis</i>         | CMNH 17620 (58)                      |
| <i>Arctonyx_collaris</i>      | AMNH 57373                           |
| <i>Atilax_paludinosus</i>     | AMNH 42840                           |
| <i>Bassariscus_astutus</i>    | AMNH 135964                          |
| <i>Callorhinus_ursinus</i>    | AMNH 71169                           |
| <i>Canis_lupus</i>            | LACM 23010                           |
| <i>Canis_mesomelas</i>        | Slater <i>et al.</i> (2009) (56)     |
| <i>Civettictis_civetta</i>    | AMNH 51818                           |
| <i>Crocuta_crocuta</i>        | MVZ 164506                           |
| <i>Cryptoprocta_ferox</i>     | AMNH 100463                          |
| <i>Cynogale_bennetti</i>      | AMNH 173509                          |
| <i>Eira_barbara</i>           | AMNH 32065                           |
| <i>Enhydra_lutris</i>         | AMNH 24186                           |
| <i>Erignathus_barbatus</i>    | AMNH 98                              |
| <i>Eupleres_goudoti</i>       | AMNH 100484                          |
| <i>Felis_silvestris</i>       | AMNH 81233                           |
| <i>Fossa_fossa</i>            | AMNH 188210                          |
| <i>Galidictis_fasciata</i>    | AMNH 100479                          |
| <i>Genetta_piscivora</i>      | AMNH 51514                           |
| <i>Gulo_gulo</i>              | AMNH 182936                          |
| <i>Herpestes_javanicus</i>    | AMNH 101655                          |
| <i>Hydrurga_leptonyx</i>      | AMNH 34920                           |
| <i>Lontra_canadensis</i>      | AMNH 254476                          |
| <i>Lutra_lutra</i>            | AMNH 206592                          |
| <i>Lycaon_pictus</i>          | SAM-ZM 12245                         |
| <i>Mellivora_capensis</i>     | AMNH 89011                           |
| <i>Mephitis_mephitis</i>      | AMNH 172133                          |
| <i>Mungos_mungo</i>           | AMNH 185177                          |
| <i>Mustela_frenata</i>        | AMNH 60508                           |
| <i>Mydaus_javanensis</i>      | AMNH 106635                          |
| <i>Nandinia_binotata</i>      | AMNH 51452                           |
| <i>Neofelis_nebulosa</i>      | AMNH 22919                           |
| <i>Odobenus_rosmarus</i>      | AMNH 19270                           |

**table S1 (continued)**

|                                   |                                  |
|-----------------------------------|----------------------------------|
| <i>Panthera pardus</i>            | AMNH 113745                      |
| <i>Paradoxurus hermaphroditus</i> | AMNH 163162                      |
| <i>Parahyaena brunnea</i>         | MVZ 117842                       |
| <i>Phoca vitulina</i>             | AMNH 100                         |
| <i>Potos flavus</i>               | AMNH 239990                      |
| <i>Prionodon linsang</i>          | USNM 303036                      |
| <i>Procyon lotor</i>              | AMNH 24815                       |
| <i>Proteles cristata</i>          | AMNH 165121                      |
| <i>Spilogale putorius</i>         | AMNH 35207                       |
| <i>Suricata suricatta</i>         | AMNH 81756                       |
| <i>Taxidea taxus</i>              | AMNH 120577                      |
| <i>Tremarctos ornatus</i>         | AMNH 99308                       |
| <i>Ursus arctos</i>               | AMNH 34408                       |
| <i>Ursus maritimus</i>            | Slater <i>et al.</i> (2010) (55) |
| <i>Viverra zangalunga</i>         | AMNH 207582                      |
| <i>Vulpes vulpes</i>              | AMNH 88713                       |
| <i>Zalophus californicus</i>      | AMNH 63946                       |

---

**table S2. List of anatomical landmarks and semilandmarks used in the GMM analyses.** Column with heading “Fixed” indicates whether a particular landmark is treated as a fixed landmark (‘Yes’) or sliding semi-landmark (‘No’).

| Landmark | Label in Fig. |        | Patch Zone    | Anatomical Description                                             |
|----------|---------------|--------|---------------|--------------------------------------------------------------------|
|          | S1            | Fixed? |               |                                                                    |
| 1        | s0            | Yes    | Face          | anterior meeting point of premax                                   |
| 2        | s1            | Yes    | Face          | anterior meeting point @ tip of nasals                             |
| 3        | s2            | Yes    | Face          | half way between tip of nasals and edge of frontal landmark patch  |
| 4        | s3            | Yes    | Basicranium   | dorsal edge of foramen magnum                                      |
| 5        | s4            | Yes    | Basicranium   | ventral edge of foramen magnum                                     |
| 6        | s5            | Yes    | Basicranium   | tip of mastoid process left                                        |
| 7        | s6            | Yes    | Basicranium   | tip of mastoid process right                                       |
| 8        | s7            | Yes    | Basicranium   | midsagittal location on basicranium at anterior edge of bullae     |
| 9        | s8            | Yes    | Basicranium   | left centroid point of TMJ                                         |
| 10       | s9            | Yes    | Basicranium   | right centroid point of TMJ                                        |
| 11       | s10           | Yes    | Cranial vault | point on parasagittal crest at postorbital constriction, left side |
| 12       | s11           | No     | Cranial vault | between previous and next point                                    |
| 13       | s12           | No     | Cranial vault | between 11 and 15                                                  |
| 14       | s13           | No     | Cranial vault | between previous and next point                                    |
| 15       | s14           | Yes    | Cranial vault | Meeting point between sagittal and occipital crests, left side     |
| 16       | s15           | Yes    | Cranial vault | postorbital constriction lateral wall, left side                   |
| 17       | s16           | No     | Cranial vault | between previous and next point                                    |
| 18       | s17           | No     | Cranial vault | between previous and next point                                    |
| 19       | s18           | No     | Cranial vault | between previous and next point                                    |
| 20       | s19           | No     | Cranial vault | between 15 and 25                                                  |
| 21       | s20           | No     | Cranial vault | between 16 and 26                                                  |
| 22       | s21           | No     | Cranial vault | between previous and next point                                    |
| 23       | s22           | No     | Cranial vault | between 13 and 33                                                  |
| 24       | s23           | No     | Cranial vault | between previous and next point                                    |
| 25       | s24           | Yes    | Cranial vault | between 15 and 35 on the occipital crest, left side                |

**table S2 (continued)**

|    |     |     |               |                                                                                |
|----|-----|-----|---------------|--------------------------------------------------------------------------------|
| 26 | s25 | No  | Cranial vault | between 16 and 31                                                              |
| 27 | s26 | No  | Cranial vault | between previous and next point                                                |
| 28 | s27 | No  | Cranial vault | between previous and next point                                                |
| 29 | s28 | No  | Cranial vault | between previous and next point                                                |
| 30 | s29 | No  | Cranial vault | between 25 and 35                                                              |
| 31 | s30 | Yes | Cranial vault | medial and anterior-most point of the zygomatic process of temporal, left side |
| 32 | s31 | No  | Cranial vault | between previous and next point                                                |
| 33 | s32 | Yes | Cranial vault | between 31 and 35                                                              |
| 34 | s33 | No  | Cranial vault | between previous and next point                                                |
| 35 | s34 | Yes | Cranial vault | most medial point on the dorsal edge of external auditory meatus               |
| 36 | s35 | Yes | Cranial vault | 36 to 60 are mirrored landmarks of 11 to 35 on the right side                  |
| 37 | s36 | No  | Cranial vault | 36 to 60 are mirrored landmarks of 11 to 35 on the right side                  |
| 38 | s37 | No  | Cranial vault | 36 to 60 are mirrored landmarks of 11 to 35 on the right side                  |
| 39 | s38 | No  | Cranial vault | 36 to 60 are mirrored landmarks of 11 to 35 on the right side                  |
| 40 | s39 | Yes | Cranial vault | 36 to 60 are mirrored landmarks of 11 to 35 on the right side                  |
| 41 | s40 | Yes | Cranial vault | 36 to 60 are mirrored landmarks of 11 to 35 on the right side                  |
| 42 | s41 | No  | Cranial vault | 36 to 60 are mirrored landmarks of 11 to 35 on the right side                  |
| 43 | s42 | No  | Cranial vault | 36 to 60 are mirrored landmarks of 11 to 35 on the right side                  |
| 44 | s43 | No  | Cranial vault | 36 to 60 are mirrored landmarks of 11 to 35 on the right side                  |
| 45 | s44 | No  | Cranial vault | 36 to 60 are mirrored landmarks of 11 to 35 on the right side                  |
| 46 | s45 | No  | Cranial vault | 36 to 60 are mirrored landmarks of 11 to 35 on the right side                  |
| 47 | s46 | No  | Cranial vault | 36 to 60 are mirrored landmarks of 11 to 35 on the right side                  |
| 48 | s47 | No  | Cranial vault | 36 to 60 are mirrored landmarks of 11 to 35 on the right side                  |
| 49 | s48 | No  | Cranial vault | 36 to 60 are mirrored landmarks of 11 to 35 on the right side                  |



**table S2 (continued)**

|    |     |     |               |                                                                  |
|----|-----|-----|---------------|------------------------------------------------------------------|
| 50 | s49 | Yes | Cranial vault | 36 to 60 are mirrored landmarks of 11 to 35 on the right side    |
| 51 | s50 | No  | Cranial vault | 36 to 60 are mirrored landmarks of 11 to 35 on the right side    |
| 52 | s51 | No  | Cranial vault | 36 to 60 are mirrored landmarks of 11 to 35 on the right side    |
| 53 | s52 | No  | Cranial vault | 36 to 60 are mirrored landmarks of 11 to 35 on the right side    |
| 54 | s53 | No  | Cranial vault | 36 to 60 are mirrored landmarks of 11 to 35 on the right side    |
| 55 | s54 | No  | Cranial vault | 36 to 60 are mirrored landmarks of 11 to 35 on the right side    |
| 56 | s55 | Yes | Cranial vault | 36 to 60 are mirrored landmarks of 11 to 35 on the right side    |
| 57 | s56 | No  | Cranial vault | 36 to 60 are mirrored landmarks of 11 to 35 on the right side    |
| 58 | s57 | Yes | Cranial vault | 36 to 60 are mirrored landmarks of 11 to 35 on the right side    |
| 59 | s58 | No  | Cranial vault | 36 to 60 are mirrored landmarks of 11 to 35 on the right side    |
| 60 | s59 | Yes | Cranial vault | 36 to 60 are mirrored landmarks of 11 to 35 on the right side    |
| 61 | s60 | Yes | Zygoma        | Highest point of the postorbital process of zygomatic, left side |
| 62 | s61 | No  | Zygoma        | between previous and next point                                  |
| 63 | s62 | No  | Zygoma        | between 61 and 65                                                |
| 64 | s63 | No  | Zygoma        | between previous and next point                                  |
| 65 | s64 | Yes | Zygoma        | Highest point of the temporal process of zygoma, left side       |
| 66 | s65 | No  | Zygoma        | between 61 and 71                                                |
| 67 | s66 | No  | Zygoma        | between previous and next point                                  |
| 68 | s67 | No  | Zygoma        | between 63 and 73                                                |
| 69 | s68 | No  | Zygoma        | between previous and next point                                  |
| 70 | s69 | No  | Zygoma        | between 65 and 75                                                |
| 71 | s70 | No  | Zygoma        | between 61 and 81                                                |
| 72 | s71 | No  | Zygoma        | between previous and next point                                  |
| 73 | s72 | No  | Zygoma        | between 63 and 83                                                |
| 74 | s73 | No  | Zygoma        | between previous and next point                                  |
| 75 | s74 | No  | Zygoma        | between 65 and 85                                                |
| 76 | s75 | No  | Zygoma        | between 71 and 81                                                |
| 77 | s76 | No  | Zygoma        | between previous and next point                                  |
| 78 | s77 | No  | Zygoma        | between 73 and 83                                                |
| 79 | s78 | No  | Zygoma        | between previous and next point                                  |
| 80 | s79 | No  | Zygoma        | between 75 and 85                                                |
| 81 | s80 | Yes | Zygoma        | Base of zygomatic arch above tooth row, left side                |

**table S2 (continued)**

|     |      |     |        |                                                            |
|-----|------|-----|--------|------------------------------------------------------------|
| 82  | s81  | No  | Zygoma | between previous and next point                            |
| 83  | s82  | No  | Zygoma | between 81 and 85                                          |
| 84  | s83  | No  | Zygoma | between previous and next point                            |
| 85  | s84  | Yes | Zygoma | inflection point between zygomatic arch and TMJ, left side |
| 86  | s85  | Yes | Zygoma | 86-110 are mirrored landmarks of 61 to 85 on right side    |
| 87  | s86  | Yes | Zygoma | 86-110 are mirrored landmarks of 61 to 85 on right side    |
| 88  | s87  | No  | Zygoma | 86-110 are mirrored landmarks of 61 to 85 on right side    |
| 89  | s88  | Yes | Zygoma | 86-110 are mirrored landmarks of 61 to 85 on right side    |
| 90  | s89  | No  | Zygoma | 86-110 are mirrored landmarks of 61 to 85 on right side    |
| 91  | s90  | Yes | Zygoma | 86-110 are mirrored landmarks of 61 to 85 on right side    |
| 92  | s91  | No  | Zygoma | 86-110 are mirrored landmarks of 61 to 85 on right side    |
| 93  | s92  | No  | Zygoma | 86-110 are mirrored landmarks of 61 to 85 on right side    |
| 94  | s93  | No  | Zygoma | 86-110 are mirrored landmarks of 61 to 85 on right side    |
| 95  | s94  | No  | Zygoma | 86-110 are mirrored landmarks of 61 to 85 on right side    |
| 96  | s95  | No  | Zygoma | 86-110 are mirrored landmarks of 61 to 85 on right side    |
| 97  | s96  | Yes | Zygoma | 86-110 are mirrored landmarks of 61 to 85 on right side    |
| 98  | s97  | No  | Zygoma | 86-110 are mirrored landmarks of 61 to 85 on right side    |
| 99  | s98  | Yes | Zygoma | 86-110 are mirrored landmarks of 61 to 85 on right side    |
| 100 | s99  | No  | Zygoma | 86-110 are mirrored landmarks of 61 to 85 on right side    |
| 101 | s100 | Yes | Zygoma | 86-110 are mirrored landmarks of 61 to 85 on right side    |
| 102 | s101 | No  | Zygoma | 86-110 are mirrored landmarks of 61 to 85 on right side    |
| 103 | s102 | No  | Zygoma | 86-110 are mirrored landmarks of 61 to 85 on right side    |
| 104 | s103 | No  | Zygoma | 86-110 are mirrored landmarks of 61 to 85 on right side    |
| 105 | s104 | No  | Zygoma | 86-110 are mirrored landmarks of 61 to 85 on right side    |
| 106 | s105 | No  | Zygoma | 86-110 are mirrored landmarks of 61 to 85 on right side    |

**table S2 (continued)**

|     |      |     |         |                                                                                                                     |
|-----|------|-----|---------|---------------------------------------------------------------------------------------------------------------------|
| 107 | s106 | Yes | Zygoma  | 86-110 are mirrored landmarks of 61 to 85 on right side                                                             |
| 108 | s107 | No  | Zygoma  | 86-110 are mirrored landmarks of 61 to 85 on right side                                                             |
| 109 | s108 | Yes | Zygoma  | 86-110 are mirrored landmarks of 61 to 85 on right side                                                             |
| 110 | s109 | No  | Zygoma  | 86-110 are mirrored landmarks of 61 to 85 on right side                                                             |
| 111 | s110 | Yes | Frontal | Half way point along orbital rim between posortibal process and inflection point on ventral orbital rim, right side |
| 112 | s111 | No  | Frontal | between previous and next point                                                                                     |
| 113 | s112 | No  | Frontal | between 111 and 115                                                                                                 |
| 114 | s113 | No  | Frontal | between previous and next point                                                                                     |
| 115 | s114 | Yes | Frontal | tip of postorbital process of frontal, right side                                                                   |
| 116 | s115 | No  | Frontal | between 111 and 121                                                                                                 |
| 117 | s116 | No  | Frontal | between previous and next point                                                                                     |
| 118 | s117 | No  | Frontal | between previous and next point                                                                                     |
| 119 | s118 | No  | Frontal | between previous and next point                                                                                     |
| 120 | s119 | No  | Frontal | between 115 and 125                                                                                                 |
| 121 | s120 | No  | Frontal | between 111 and 131                                                                                                 |
| 122 | s121 | No  | Frontal | between previous and next point                                                                                     |
| 123 | s122 | No  | Frontal | between 121 and 125                                                                                                 |
| 124 | s123 | No  | Frontal | between previous and next point                                                                                     |
| 125 | s124 | No  | Frontal | between 115 and 135                                                                                                 |
| 126 | s125 | No  | Frontal | between 121 and 131                                                                                                 |
| 127 | s126 | No  | Frontal | between previous and next point                                                                                     |
| 128 | s127 | No  | Frontal | between previous and next point                                                                                     |
| 129 | s128 | No  | Frontal | between previous and next point                                                                                     |
| 130 | s129 | No  | Frontal | between 125 and 135                                                                                                 |
| 131 | s130 | Yes | Frontal | 131 to 135 are mirrored landmarks of 111 to 115 on left side                                                        |
| 132 | s131 | No  | Frontal | 131 to 135 are mirrored landmarks of 111 to 115 on left side                                                        |
| 133 | s132 | No  | Frontal | 131 to 135 are mirrored landmarks of 111 to 115 on left side                                                        |
| 134 | s133 | No  | Frontal | 131 to 135 are mirrored landmarks of 111 to 115 on left side                                                        |
| 135 | s134 | Yes | Frontal | 131 to 135 are mirrored landmarks of 111 to 115 on left side                                                        |
| 136 | s135 | Yes | Palate  | edge of canine alveolus halfway between anterior and posterior borders of canine, right side                        |
| 137 | s136 | No  | Palate  | between previous and next point                                                                                     |

**table S2 (continued)**

|     |      |     |        |                                                                       |
|-----|------|-----|--------|-----------------------------------------------------------------------|
| 138 | s137 | No  | Palate | between 136 and 140                                                   |
| 139 | s138 | No  | Palate | between previous and next point                                       |
| 140 | s139 | Yes | Palate | inflection point on the posterior edge of the hard palate, right side |
| 141 | s140 | No  | Palate | between 136 and 146                                                   |
| 142 | s141 | No  | Palate | between previous and next point                                       |
| 143 | s142 | No  | Palate | between previous and next point                                       |
| 144 | s143 | No  | Palate | between previous and next point                                       |
| 145 | s144 | No  | Palate | between 140 and 150                                                   |
| 146 | s145 | Yes | Palate | Anterior edge of palate posterior to suture between first incisors    |
| 147 | s146 | No  | Palate | between previous and next point                                       |
| 148 | s147 | No  | Palate | between 146 and 150                                                   |
| 149 | s148 | No  | Palate | between previous and next point                                       |
| 150 | s149 | Yes | Palate | Posterior-most point on mid-sagittal axis of palate                   |
| 151 | s150 | Yes | Palate | 151 to 160 are mirrored landmarks of 136 to 145 on left side          |
| 152 | s151 | No  | Palate | 151 to 160 are mirrored landmarks of 136 to 145 on left side          |
| 153 | s152 | No  | Palate | 151 to 160 are mirrored landmarks of 136 to 145 on left side          |
| 154 | s153 | No  | Palate | 151 to 160 are mirrored landmarks of 136 to 145 on left side          |
| 155 | s154 | Yes | Palate | 151 to 160 are mirrored landmarks of 136 to 145 on left side          |
| 156 | s155 | No  | Palate | 151 to 160 are mirrored landmarks of 136 to 145 on left side          |
| 157 | s156 | No  | Palate | 151 to 160 are mirrored landmarks of 136 to 145 on left side          |
| 158 | s157 | No  | Palate | 151 to 160 are mirrored landmarks of 136 to 145 on left side          |
| 159 | s158 | No  | Palate | 151 to 160 are mirrored landmarks of 136 to 145 on left side          |
| 160 | s159 | No  | Palate | 151 to 160 are mirrored landmarks of 136 to 145 on left side          |
| 161 | s160 | Yes | Face   | Mid-point on edge of rostral opening on premaxilla, left side         |
| 162 | s161 | Yes | Face   | Dorsal edge of infraorbital foramen, left side                        |
| 163 | s162 | Yes | Face   | Ventral-most point on the orbital rim, left side                      |
| 164 | s163 | No  | Face   | between 161 and 167                                                   |
| 165 | s164 | No  | Face   | between 162 and 168                                                   |

**table S2 (continued)**

|     |      |     |      |                                                                          |
|-----|------|-----|------|--------------------------------------------------------------------------|
| 166 | s165 | Yes | Face | Anterior point of canine at the edge of alveolus, left side              |
| 167 | s166 | No  | Face | between 164 and 170                                                      |
| 168 | s167 | No  | Face | between 162 and 174                                                      |
| 169 | s168 | No  | Face | between 163 and 175                                                      |
| 170 | s169 | No  | Face | between 167 and 173                                                      |
| 171 | s170 | No  | Face | between 168 and 174                                                      |
| 172 | s171 | No  | Face | between 169 and 175                                                      |
| 173 | s172 | Yes | Face | Posterior edge of canine at the alveolus, left side                      |
| 174 | s173 | No  | Face | between 173 and 175                                                      |
| 175 | s174 | Yes | Face | Edge between bone and tooth at the position of the last tooth, left side |
| 176 | s175 | Yes | Face | 176 to 190 are mirrored landmarks of 161 to 175 on the right side        |
| 177 | s176 | Yes | Face | 176 to 190 are mirrored landmarks of 161 to 175 on the right side        |
| 178 | s177 | Yes | Face | 176 to 190 are mirrored landmarks of 161 to 175 on the right side        |
| 179 | s178 | No  | Face | 176 to 190 are mirrored landmarks of 161 to 175 on the right side        |
| 180 | s179 | No  | Face | 176 to 190 are mirrored landmarks of 161 to 175 on the right side        |
| 181 | s180 | Yes | Face | 176 to 190 are mirrored landmarks of 161 to 175 on the right side        |
| 182 | s181 | No  | Face | 176 to 190 are mirrored landmarks of 161 to 175 on the right side        |
| 183 | s182 | No  | Face | 176 to 190 are mirrored landmarks of 161 to 175 on the right side        |
| 184 | s183 | No  | Face | 176 to 190 are mirrored landmarks of 161 to 175 on the right side        |
| 185 | s184 | No  | Face | 176 to 190 are mirrored landmarks of 161 to 175 on the right side        |
| 186 | s185 | No  | Face | 176 to 190 are mirrored landmarks of 161 to 175 on the right side        |
| 187 | s186 | No  | Face | 176 to 190 are mirrored landmarks of 161 to 175 on the right side        |
| 188 | s187 | Yes | Face | 176 to 190 are mirrored landmarks of 161 to 175 on the right side        |
| 189 | s188 | No  | Face | 176 to 190 are mirrored landmarks of 161 to 175 on the right side        |
| 190 | s189 | Yes | Face | 176 to 190 are mirrored landmarks of 161 to 175 on the right side        |

---

**table S3. Ecological attributes of species analyzed.** Data compiled from the PanTHERIA database (28).

| Taxon                         | Clade      | Family      | Activity Cycle* | Terrestriality/ Arboreality† | Habitat Breadth <sup>1</sup> | Diet Breadth <sup>2</sup> | Trophic Level <sup>3</sup> | Max. Longevity (months) | Sexual Maturity Age (days) | Mean Monthly Precipitation (mm) | Mean Monthly Temperature (0.1°C) |
|-------------------------------|------------|-------------|-----------------|------------------------------|------------------------------|---------------------------|----------------------------|-------------------------|----------------------------|---------------------------------|----------------------------------|
| <i>Acinonyx jubatus</i>       | Feliformia | Felidae     | 3               | 1                            | 1                            | 1                         | 3                          | 228                     | 741.97                     | 51.26                           | 230.83                           |
| <i>Ailuropoda melanoleuca</i> | Caniformia | Ursidae     | 2               | 1                            | 1                            | 3                         | 1                          | 360                     | 2413.02                    | 101.81                          | 65.51                            |
| <i>Ailurus fulgens</i>        | Caniformia | Ailuridae   | 2               | 1                            | 1                            | 3                         | 1                          | 168                     | 604.05                     | 131.93                          | 44.73                            |
| <i>Aonyx capensis</i>         | Caniformia | Mustelidae  | 2               | 1                            | 2                            | 6                         | 2                          | 132                     | 371.23                     | 100.07                          | 233.07                           |
| <i>Arctonyx collaris</i>      | Caniformia | Mustelidae  | 1               | 1                            | 1                            | 6                         | 2                          | 167                     |                            | 124.48                          | 169.67                           |
| <i>Atilax paludinosus</i>     | Feliformia | Herpestidae | 2               | 1                            | 2                            | 6                         | 2                          | 209                     | 234.83                     | 99.93                           | 233.39                           |
| <i>Bassariscus astutus</i>    | Caniformia | Procyonidae | 1               | 1                            | 1                            | 6                         | 2                          | 198                     | 278.08                     | 45.32                           | 153.99                           |
| <i>Callorhinus ursinus</i>    | Caniformia | Otariidae   | 2               | 1                            | 2                            | 6                         | 2                          | 420                     | 1683.65                    |                                 |                                  |
| <i>Canis lupus</i>            | Caniformia | Canidae     | 2               | 1                            | 1                            | 1                         | 3                          | 354                     | 679.37                     | 34.79                           | 4.82                             |
| <i>Canis mesomelas</i>        | Caniformia | Canidae     | 2               | 1                            | 1                            | 6                         | 2                          | 168                     | 241.4                      | 49.27                           | 213.33                           |
| <i>Civettictis civetta</i>    | Feliformia | Viverridae  | 1               | 1                            | 1                            | 6                         | 2                          | 336                     | 286.24                     | 101.3                           | 237.14                           |
| <i>Crocuta crocuta</i>        | Feliformia | Hyaenidae   | 1               | 1                            | 1                            | 1                         | 3                          | 493.2                   | 789.54                     | 78.32                           | 238.46                           |
| <i>Cryptoprocta ferox</i>     | Feliformia | Eupleridae  | 2               | 2                            | 3                            | 2                         | 3                          | 240                     | 1262.74                    | 125.27                          | 221.98                           |
| <i>Cynogale bennetti</i>      | Feliformia | Viverridae  | 2               | 1                            | 2                            | 6                         | 2                          | 60                      |                            | 235.45                          | 254.4                            |
| <i>Eira barbara</i>           | Caniformia | Mustelidae  | 2               | 2                            | 2                            | 2                         | 2                          | 216                     | 766.15                     | 149.9                           | 235.82                           |
| <i>Enhydra lutris</i>         | Caniformia | Mustelidae  | 3               | 1                            | 1                            | 6                         | 2                          | 360                     | 1022.33                    |                                 |                                  |
| <i>Erignathus barbatus</i>    | Caniformia | Phocidae    |                 | 2                            | 1                            | 2                         |                            | 377.43                  | 2199.16                    |                                 |                                  |
| <i>Eupleres goudoti</i>       | Feliformia | Eupleridae  | 2               | 1                            | 1                            | 6                         | 2                          |                         |                            | 163.67                          | 207.15                           |
| <i>Felis silvestris</i>       | Feliformia | Felidae     | 2               | 1                            | 1                            | 1                         | 3                          | 336                     | 350.76                     | 46.98                           | 192.78                           |
| <i>Fossa fossa</i>            | Feliformia | Eupleridae  | 1               | 2                            | 2                            | 6                         | 2                          | 132                     | 533.97                     | 168.03                          | 202.81                           |
| <i>Galidictis fasciata</i>    | Feliformia | Eupleridae  | 2               | 1                            | 1                            | 2                         | 3                          |                         |                            | 178.59                          | 197.78                           |
| <i>Genetta piscivora</i>      | Feliformia | Viverridae  | 1               | 1                            | 2                            | 1                         | 3                          |                         |                            | 144.85                          | 236.26                           |

**table S3 (continued)**

|                                   |            |                |   |   |   |   |   |       |         |        |        |
|-----------------------------------|------------|----------------|---|---|---|---|---|-------|---------|--------|--------|
| <i>Gulo_gulo</i>                  | Caniformia | Mustelidae     | 1 | 1 | 1 | 1 | 3 | 216   | 756.6   | 32.21  | -72.05 |
| <i>Herpestes_javanicus</i>        | Feliformia | Herpestidae    | 3 | 1 | 1 | 6 | 2 | 120   | 166.84  | 96.01  | 208.18 |
| <i>Hydrurga_leptonyx</i>          | Caniformia | Phocidae       | 2 | 1 | 2 | 6 | 2 | 312   | 1389.01 |        |        |
| <i>Lontra_canadensis</i>          | Caniformia | Mustelidae     | 2 | 1 | 2 | 1 | 3 | 300   | 729.99  | 55.55  | 10.63  |
| <i>Lutra_lutra</i>                | Caniformia | Mustelidae     | 1 | 1 | 2 | 1 | 3 | 264   | 700.76  | 56.63  | 50.26  |
| <i>Lycaon_pictus</i>              | Caniformia | Canidae        | 3 | 1 | 1 | 1 | 3 | 132   | 817.15  | 68.95  | 235.55 |
| <i>Mellivora_capensis</i>         | Caniformia | Mustelidae     | 2 | 1 | 1 | 6 | 2 | 318   |         | 66.13  | 236.56 |
| <i>Mephitis_mephitis</i>          | Caniformia | Mephitidae     | 1 | 1 | 1 | 6 | 2 | 155   | 355.18  | 52.67  | 75.97  |
| <i>Mungos_mungo</i>               | Feliformia | Herpestidae    | 3 | 1 | 1 | 1 | 3 | 144   | 349.33  | 78.76  | 238.55 |
| <i>Mustela_frenata</i>            | Caniformia | Mustelidae     | 2 | 2 | 2 | 1 | 3 | 85.23 | 200.69  | 78.21  | 130.93 |
| <i>Mydaus_javanensis</i>          | Caniformia | Mephitidae     | 1 | 1 | 1 | 6 | 2 |       |         | 242.37 | 248.86 |
| <i>Nandinia_binotata</i>          | Feliformia | Nandiniidae    | 1 | 2 | 2 | 2 | 1 | 222   | 1015    | 130.21 | 239.97 |
| <i>Neofelis_nebulosa</i>          | Feliformia | Felidae        | 2 | 2 | 2 | 1 | 3 | 204   | 753.48  | 178.64 | 218.29 |
| <i>Odobenus_rosmarus</i>          | Caniformia | Odobenidae     | 2 | 1 | 2 | 6 | 2 | 480   | 2315.02 |        |        |
| <i>Panthera_pardus</i>            | Feliformia | Felidae        | 2 | 1 | 1 | 1 | 3 | 276   | 810.68  | 88.01  | 207.63 |
| <i>Paradoxurus_hermaphroditus</i> | Feliformia | Viverridae     | 1 | 1 | 1 | 6 | 2 | 269   | 397.85  | 152.93 | 232.59 |
| <i>Parahyaena_brunnea</i>         | Feliformia | Hyaenidae      | 1 | 1 | 2 | 6 | 2 | 204   | 807.23  | 34.35  | 186.6  |
| <i>Phoca_vitulina</i>             | Caniformia | Phocidae       | 2 | 1 | 2 | 1 | 3 | 480   | 1526.85 |        |        |
| <i>Potos_flavus</i>               | Caniformia | Procyonidae    | 1 | 2 | 2 | 4 | 2 | 348   | 858.41  | 153.67 | 241.49 |
| <i>Prionodon_linsang</i>          | Feliformia | Prionodontidae | 1 | 1 | 1 | 6 | 2 | 128.4 |         | 236.46 | 249.83 |
| <i>Procyon_lotor</i>              | Caniformia | Procyonidae    | 2 | 2 | 2 | 6 | 2 | 252   | 561.28  | 63.25  | 111.84 |
| <i>Proteles_cristata</i>          | Feliformia | Hyaenidae      | 1 | 1 | 1 | 1 | 3 | 300   | 631.37  | 46.96  | 210.08 |
| <i>Spilogale_putorius</i>         | Caniformia | Mephitidae     | 1 | 1 | 1 | 6 | 2 | 120   | 196.96  | 72.47  | 134.16 |
| <i>Suricata_suricatta</i>         | Feliformia | Herpestidae    | 3 | 1 | 1 | 1 | 3 | 150   | 377.37  | 26.55  | 175.81 |
| <i>Taxidea_taxus</i>              | Caniformia | Mustelidae     | 1 | 1 | 1 | 1 | 3 | 312   | 365     | 41.62  | 91.54  |
| <i>Tremarctos_ornatus</i>         | Caniformia | Ursidae        | 2 | 1 | 1 | 5 | 2 | 437   |         | 125.36 | 179.82 |
| <i>Ursus_arctos</i>               | Caniformia | Ursidae        | 2 | 1 | 1 | 6 | 2 | 600   | 1327.95 | 35.01  | -46.56 |

**table S3 (continued)**

|                              |            |            |   |   |   |   |   |       |         |        |        |
|------------------------------|------------|------------|---|---|---|---|---|-------|---------|--------|--------|
| <i>Ursus_maritimus</i>       | Caniformia | Ursidae    | 3 | 1 | 1 | 3 | 2 | 458.4 | 1850.26 |        |        |
| <i>Viverra_tangalunga</i>    | Feliformia | Viverridae | 1 | 1 | 1 | 6 | 2 | 144   |         | 244.56 | 248.46 |
| <i>Vulpes_vulpes</i>         | Caniformia | Canidae    | 1 | 1 | 1 | 1 | 3 | 180   | 321.07  | 46.58  | 34.32  |
| <i>Zalophus_californicus</i> | Caniformia | Otariidae  | 2 | 1 | 2 | 6 | 2 | 360   | 2023.55 |        |        |

---

\*activity cycle: nocturnal (1), cathemeral or crepuscular (2), diurnal (3).

†Terrestriality: fossorial and/or ground dwelling [terrestrial] (1), above ground dwelling [arboreal] (2).

<sup>1</sup>Habitat Breadth: number of habitat categories out of: above ground dwelling, aquatic, fossorial and ground dwelling

<sup>2</sup>Diet Breadth: number of dietary categories out of: vertebrate, invertebrate, fruit, flowers/nectar/pollen, leaves/branches/bark, seeds, grass and roots/tubers

<sup>3</sup>Trophic Level: herbivore (1), omnivore (2), carnivore (3)



**table S4. Summary of sensitivity analyses of PGLS regression using different phylogenetic tree topology and branch length configurations.** Statistically significant PGLS regressions are marked in bold font. Green shades indicate significant results in the Main Analysis or in a Sensitivity Analysis and shared with the Main Analysis. Yellow shades indicate lack of significant correlation in a Sensitivity Analysis relative to the Main Analysis. Blue shades indicate presence of significant correlation in a Sensitivity Analysis that is not observed in the Main Analysis. For details of configuration in each analysis, see Supplementary Materials text.

|                              | Carnivora        | Caniformia     | Feliformia       | Carnivora                 | Caniformia     | Feliformia       |
|------------------------------|------------------|----------------|------------------|---------------------------|----------------|------------------|
|                              | Main Analysis    |                |                  | Sensitivity Analysis<br>1 |                |                  |
| GMM Data (G)                 |                  |                |                  |                           |                |                  |
| G1. CS                       | <b>0.03</b>      | 0.17           | <b>0.04</b>      | <b>0.02</b>               | 0.17           | <b>0.02</b>      |
| Locomotion & Activity (LA)   |                  |                |                  |                           |                |                  |
| LA1. Activity Cycle          | 0.36             | 0.60           | 0.67             | 0.49                      | 0.60           | 0.58             |
| LA2. Terrestriality          | 0.62             | 0.47           | 0.61             | 0.60                      | 0.46           | 0.52             |
| LA3. Habitat Breadth         | 0.64             | 0.66           | 0.61             | 0.58                      | 0.66           | 0.59             |
| LA1+2+3                      | 0.44/0.76/0.76   | 0.65/0.79/0.42 | 0.68/0.93/0.86   | 0.54/0.73/0.49            | 0.65/0.79/0.42 | 0.80/0.56/0.88   |
| Feeding Ecology (FE)         |                  |                |                  |                           |                |                  |
| FE1. Dietary Breadth         | <b>0.01</b>      | 0.31           | <b>0.003</b>     | 0.09                      | 0.31           | <b>0.05</b>      |
| FE2. Trophic Level           | <b>0.03</b>      | 0.08           | <b>0.03</b>      | <b>0.04</b>               | 0.08           | 0.12             |
| FE1+2                        | <b>0.03/0.03</b> | 0.40/0.13      | <b>0.01/0.04</b> | 0.16/0.06                 | 0.40/0.13      | <b>0.02/0.24</b> |
| Life History (LH)            |                  |                |                  |                           |                |                  |
| LH1. Longevity               | 0.18             | 0.24           | 0.36             | 0.23                      | 0.24           | 0.45             |
| LH2. Age at Sexual Maturity  | <b>0.02</b>      | <b>0.03</b>    | 0.65             | <b>0.02</b>               | <b>0.03</b>    | 0.79             |
| LH1+LH2                      | 0.40/0.06        | 0.29/0.13      | 0.86/0.77        | 0.45/0.07                 | 0.29/0.13      | 0.95/0.83        |
| Environmental Variables (EV) |                  |                |                  |                           |                |                  |
| EV1. Mean Precipitation      | 0.06             | 0.39           | 0.08             | <b>0.05</b>               | 0.39           | <b>0.05</b>      |
| EV2. Mean Temperature        | 0.45             | 0.44           | 0.38             | 0.39                      | 0.44           | 0.24             |
| EV1+2                        | 0.07/0.35        | 0.43/0.41      | 0.14/0.84        | 0.06/0.33                 | 0.43/0.41      | 0.10/0.69        |

table S4 (continued)

|                                 | Carnivora                 | Caniformia     | Feliformia     | Carnivora                 | Caniformia     | Feliformia     |
|---------------------------------|---------------------------|----------------|----------------|---------------------------|----------------|----------------|
|                                 | Sensitivity Analysis<br>2 |                |                | Sensitivity Analysis<br>3 |                |                |
| GMM Data (G)                    |                           |                |                |                           |                |                |
| G1. CS                          | 0.99                      | 0.11           | 0.99           | 0.03                      | 0.09           | 0.002          |
| Locomotion & Activity<br>(LA)   |                           |                |                |                           |                |                |
| LA1. Activity Cycle             | 0.97                      | 0.73           | 0.97           | 0.42                      | 0.65           | 0.17           |
| LA2. Terrestriality             | 0.98                      | 0.74           | 0.98           | 0.44                      | 0.28           | 0.89           |
| LA3. Habitat Breadth            | 0.99                      | 0.51           | 0.99           | 0.17                      | 0.19           | 0.45           |
| LA1+2+3                         | 0.99/0.99/0.99            | 0.72/0.78/0.28 | 0.99/0.99/0.98 | 0.47/0.84/0.17            | 0.71/0.91/0.20 | 0.36/0.89/0.63 |
| Feeding Ecology (FE)            |                           |                |                |                           |                |                |
| FE1. Dietary Breadth            | 0.02                      | 0.75           | 0.11           | 0.58                      | 0.59           | 0.001          |
| FE2. Trophic Level              | 0.01                      | 0.32           | 0.03           | 0.45                      | 0.33           | 0.003          |
| FE1+2                           | 0.03/0.01                 | 0.51/0.44      | 0.13/0.23      | 0.52/0.56                 | 0.47/0.58      | 0.02/0.35      |
| Life History (LH)               |                           |                |                |                           |                |                |
| LH1. Longevity                  | 0.26                      | 0.77           | 0.16           | 0.36                      | 0.43           | 0.13           |
| LH2. Age at Sexual<br>Maturity  | 0.47                      | 0.33           | 0.52           | 0.21                      | 0.20           | 0.53           |
| LH1+LH2                         | 0.48/0.43                 | 0.68/0.36      | 0.61/0.66      | 0.45/0.29                 | 0.38/0.28      | 0.58/0.72      |
| Environmental Variables<br>(EV) |                           |                |                |                           |                |                |
| EV1. Mean Precipitation         | 0.13                      | 0.39           | 0.99           | 0.26                      | 0.50           | 0.01           |
| EV2. Mean Temperature           | 1.00                      | 0.42           | 0.99           | 0.81                      | 0.61           | 0.06           |
| EV1+2                           | 0.99/0.99                 | 0.43/0.49      | 1.00/0.61      | 0.30/0.36                 | 0.55/0.57      | 0.02/0.61      |

**table S4 (continued)**

|                                 | Carnivora                 | Caniformia     | Feliformia       | Carnivora                 | Caniformia     | Feliformia       |
|---------------------------------|---------------------------|----------------|------------------|---------------------------|----------------|------------------|
|                                 | Sensitivity Analysis<br>4 |                |                  | Sensitivity Analysis<br>5 |                |                  |
| GMM Data (G)                    |                           |                |                  |                           |                |                  |
| G1. CS                          | <b>0.01</b>               | 0.14           | <b>0.05</b>      | <b>0.01</b>               | 0.13           | <b>0.06</b>      |
| Locomotion & Activity<br>(LA)   |                           |                |                  |                           |                |                  |
| LA1. Activity Cycle             | 0.74                      | 0.67           | 0.79             | 0.77                      | 0.70           | 0.84             |
| LA2. Terrestriality             | 0.76                      | 0.57           | 0.68             | 0.76                      | 0.59           | 0.66             |
| LA3. Habitat Breadth            | 0.60                      | 0.46           | 0.70             | 0.64                      | 0.48           | 0.72             |
| LA1+2+3                         | 0.78/0.85/0.45            | 0.75/0.86/0.16 | 0.84/0.84/0.61   | 0.81/0.85/0.50            | 0.78/0.86/0.21 | 0.88/0.80/0.70   |
| Feeding Ecology (FE)            |                           |                |                  |                           |                |                  |
| FE1. Dietary Breadth            | <b>0.44</b>               | 0.71           | <b>0.002</b>     | <b>0.46</b>               | 0.72           | <b>0.001</b>     |
| FE2. Trophic Level              | <b>0.45</b>               | 0.42           | <b>0.01</b>      | <b>0.48</b>               | 0.44           | <b>0.004</b>     |
| FE1+2                           | <b>0.48/0.08</b>          | 0.53/0.53      | <b>0.02/0.02</b> | <b>0.53/0.09</b>          | 0.57/0.52      | <b>0.01/0.02</b> |
| Life History (LH)               |                           |                |                  |                           |                |                  |
| LH1. Longevity                  | 0.74                      | 0.90           | 0.60             | 0.71                      | 0.92           | 0.54             |
| LH2. Age at Sexual<br>Maturity  | <b>0.36</b>               | <b>0.45</b>    | 0.47             | <b>0.28</b>               | <b>0.42</b>    | 0.52             |
| LH1+LH2                         | 0.92/0.29                 | 0.87/0.36      | 0.73/0.65        | 0.93/0.23                 | 0.89/0.34      | 0.71/0.66        |
| Environmental Variables<br>(EV) |                           |                |                  |                           |                |                  |
| EV1. Mean Precipitation         | 0.36                      | 0.48           | 0.38             | 0.34                      | 0.45           | 0.34             |
| EV2. Mean Temperature           | 0.69                      | 0.52           | 0.19             | 0.70                      | 0.52           | 0.21             |
| EV1+2                           | 0.40/0.35                 | 0.53/0.49      | 0.52/0.45        | 0.37/0.33                 | 0.49/0.50      | 0.49/0.51        |

**table S4 (continued)**

|                                 | Carnivora                 | Caniformia     | Feliformia       | Carnivora                 | Caniformia     | Feliformia       |
|---------------------------------|---------------------------|----------------|------------------|---------------------------|----------------|------------------|
|                                 | Sensitivity Analysis<br>6 |                |                  | Sensitivity Analysis<br>7 |                |                  |
| GMM Data (G)                    |                           |                |                  |                           |                |                  |
| G1. CS                          | <b>0.01</b>               | 0.07           | <b>0.01</b>      | <b>0.01</b>               | 0.12           | <b>0.01</b>      |
| Locomotion & Activity<br>(LA)   |                           |                |                  |                           |                |                  |
| LA1. Activity Cycle             | 0.26                      | 0.85           | 0.28             | 0.47                      | 0.79           | 0.77             |
| LA2. Terrestriality             | 0.82                      | 0.74           | 0.78             | 0.76                      | 0.47           | 0.66             |
| LA3. Habitat Breadth            | 0.45                      | 0.20           | 0.59             | 0.59                      | 0.48           | 0.75             |
| LA1+2+3                         | 0.30/0.88/0.27            | 0.88/0.96/0.06 | 0.50/0.80/0.66   | 0.58/0.81/0.72            | 0.86/0.92/0.23 | 0.92/0.82/0.96   |
| Feeding Ecology (FE)            |                           |                |                  |                           |                |                  |
| FE1. Dietary Breadth            | <b>0.03</b>               | 0.24           | <b>0.01</b>      | 0.18                      | 0.65           | <b>0.004</b>     |
| FE2. Trophic Level              | <b>0.02</b>               | 0.08           | <b>0.01</b>      | 0.38                      | 0.39           | <b>0.03</b>      |
| FE1+2                           | <b>0.03/0.44</b>          | 0.13/0.49      | <b>0.03/0.43</b> | <b>0.40/0.03</b>          | 0.51/0.52      | <b>0.07/0.01</b> |
| Life History (LH)               |                           |                |                  |                           |                |                  |
| LH1. Longevity                  | 0.19                      | 0.27           | 0.16             | 0.82                      | 0.82           | 0.57             |
| LH2. Age at Sexual<br>Maturity  | 0.37                      | 0.13           | 0.69             | 0.17                      | 0.29           | 0.51             |
| LH1+LH2                         | 0.62/0.72                 | 0.36/0.47      | 0.75/0.77        | 0.95/0.27                 | 0.84/0.31      | 0.91/0.69        |
| Environmental Variables<br>(EV) |                           |                |                  |                           |                |                  |
| EV1. Mean Precipitation         | <b>0.03</b>               | 0.43           | <b>0.02</b>      | 0.22                      | 0.47           | 0.19             |
| EV2. Mean Temperature           | 0.32                      | 0.52           | 0.18             | 0.78                      | 0.65           | 0.47             |
| EV1+2                           | <b>0.04/0.49</b>          | 0.47/0.44      | <b>0.04/0.62</b> | 0.25/0.56                 | 0.51/0.59      | 0.31/0.83        |

**table S4 (continued)**

|                              | Carnivora                 | Caniformia     | Feliformia       | Carnivora                 | Caniformia     | Feliformia       |
|------------------------------|---------------------------|----------------|------------------|---------------------------|----------------|------------------|
|                              | Sensitivity Analysis<br>8 |                |                  | Sensitivity Analysis<br>9 |                |                  |
| GMM Data (G)                 |                           |                |                  |                           |                |                  |
| G1. CS                       | <b>0.01</b>               | 0.15           | <b>0.002</b>     | <b>0.01</b>               | 0.13           | <b>0.02</b>      |
| Locomotion & Activity (LA)   |                           |                |                  |                           |                |                  |
| LA1. Activity Cycle          | 0.17                      | 0.66           | 0.20             | 0.47                      | 0.78           | 0.74             |
| LA2. Terrestriality          | 0.85                      | 0.76           | 0.89             | 0.73                      | 0.48           | 0.7              |
| LA3. Habitat Breadth         | 0.39                      | 0.28           | 0.50             | 0.52                      | 0.5            | 0.75             |
| LA1+2+3                      | 0.21/0.92/0.27            | 0.74/0.98/0.07 | 0.41/0.91/0.66   | 0.56/0.80/0.54            | 0.85/0.93/0.24 | 0.91/0.85/0.95   |
| Feeding Ecology (FE)         |                           |                |                  |                           |                |                  |
| FE1. Dietary Breadth         | <b>0.02</b>               | 0.26           | <b>0.002</b>     | 0.26                      | 0.68           | <b>0.003</b>     |
| FE2. Trophic Level           | <b>0.01</b>               | 0.09           | <b>0.002</b>     | 0.4                       | 0.43           | <b>0.02</b>      |
| FE1+2                        | <b>0.02/0.47</b>          | 0.16/0.51      | <b>0.01/0.44</b> | <b>0.43/0.04</b>          | 0.54/0.56      | <b>0.03/0.01</b> |
| Life History (LH)            |                           |                |                  |                           |                |                  |
| LH1. Longevity               | 0.15                      | 0.20           | 0.13             | 0.72                      | 0.79           | 0.47             |
| LH2. Age at Sexual Maturity  | 0.18                      | 0.08           | 0.54             | 0.16                      | 0.27           | 0.54             |
| LH1+LH2                      | 0.62/0.53                 | 0.28/0.38      | 0.67/0.71        | 0.89/0.21                 | 0.80/0.28      | 0.87/0.69        |
| Environmental Variables (EV) |                           |                |                  |                           |                |                  |
| EV1. Mean Precipitation      | <b>0.02</b>               | 0.51           | <b>0.01</b>      | 0.21                      | 0.52           | 0.16             |
| EV2. Mean Temperature        | 0.36                      | 0.41           | 0.07             | 0.75                      | 0.65           | 0.39             |
| EV1+2                        | <b>0.02/0.36</b>          | 0.56/0.39      | <b>0.01/0.57</b> | 0.25/0.50                 | 0.57/0.52      | 0.26/0.79        |

**table S5. Area and volume attributes of the theoretical morphed models analyzed.**

|                    | surface area (mm <sup>2</sup> ) | volume (mm <sup>3</sup> ) |
|--------------------|---------------------------------|---------------------------|
| cs large           | 30813.2                         | 24679.9                   |
| cs small           | 30287.5                         | 23453.3                   |
| diet broad         | 27986.3                         | 20759.2                   |
| diet narrow        | 29707.5                         | 22910.9                   |
| maturity early     | 29591.7                         | 22877.6                   |
| maturity late      | 32968.3                         | 27065.9                   |
| precipitation high | 28712.9                         | 21055                     |
| precipitation low  | 30723.4                         | 24351.4                   |
| trophic carnivore  | 30173.4                         | 23609.8                   |
| trophic herbivore  | 29224.6                         | 22924.6                   |
| trophic omnivore   | 30416.8                         | 23690.5                   |

**table S6. Output values of FE simulations in the “bending test” analysis.** SE, strain energy (in Joules); VM, von Mises (in Megapascals); hires= high resolution model; lowres= low resolution model.

|                       | hires raw<br>SE | medres raw<br>SE | lores raw<br>SE | hires VM<br>stress | medres VM<br>stress | lores VM<br>stress |
|-----------------------|-----------------|------------------|-----------------|--------------------|---------------------|--------------------|
| cs large              | 0.1482          | 0.1253           | 0.0958          | 32.24              | 28.21               | 24.22              |
| cs small              | 0.0936          | 0.1527           | 0.1137          | 25.56              | 34.19               | 29.78              |
| diet broad            | 0.1174          | 0.1287           | 0.1122          | 29.91              | 32.28               | 28.26              |
| diet narrow           | 0.0929          | 0.1377           | 0.0971          | 25.26              | 32.02               | 24.76              |
| maturity early        | 0.1104          | 0.0880           | 0.0887          | 29.09              | 25.30               | 25.71              |
| maturity late         | 0.1054          | 0.1244           | 0.1290          | 24.68              | 26.77               | 27.29              |
| precipitation<br>high | 0.1130          | 0.1101           | 0.1205          | 29.56              | 29.18               | 30.86              |
| precipitation low     | 0.1461          | 0.1183           | 0.1271          | 32.86              | 29.06               | 29.61              |
| trophic carnivore     | 0.0979          | 0.1016           | 0.1425          | 26.26              | 26.51               | 32.44              |
| trophic herbivore     | 0.1058          | 0.0800           | 0.0983          | 28.66              | 25.58               | 27.96              |
| trophic omnivore      | 0.1439          | 0.1305           | 0.0966          | 33.76              | 32.00               | 26.80              |

**table S7. Output values of FE simulations in the “temporalis-driven” analysis.** SE, strain energy (in Joules); VM, von Mises (in Megapascals); hi, high resolution model meshed using ‘fine mesh’ option; med, medium resolution model meshed using ‘medium mesh’ option; lo, low resolution model meshed using ‘coarse mesh’ option.

|                       | hi raw<br>SE | med raw<br>SE | lo raw<br>SE | hi VM<br>stress | med VM<br>stress | lo VM<br>stress | hi bite<br>force | med bite<br>force | lo bite<br>force |
|-----------------------|--------------|---------------|--------------|-----------------|------------------|-----------------|------------------|-------------------|------------------|
| cs large              | 0.0086       | 0.0079        | 0.0075       | 6.215           | 6.669            | 6.312           | 101.14           | 101.15            | 101.14           |
| cs small              | 0.0089       | 0.0083        | 0.0084       | 6.884           | 7.026            | 7.067           | 108.01           | 108.02            | 108.00           |
| diet broad            | 0.0062       | 0.0062        | 0.0062       | 6.096           | 6.143            | 6.156           | 84.85            | 84.84             | 84.84            |
| diet narrow           | 0.0064       | 0.0062        | 0.0061       | 5.509           | 5.566            | 5.608           | 90.61            | 90.60             | 90.60            |
| maturity early        | 0.0066       | 0.0066        | 0.0065       | 5.964           | 6.039            | 6.038           | 96.03            | 96.03             | 96.04            |
| maturity late         | 0.0116       | 0.0118        | 0.0119       | 7.924           | 8.064            | 8.076           | 141.14           | 141.12            | 141.13           |
| precipitation<br>high | 0.0086       | 0.0088        | 0.0091       | 7.197           | 7.228            | 7.255           | 98.69            | 98.68             | 98.67            |
| precipitation<br>low  | 0.0087       | 0.0083        | 0.0082       | 6.793           | 6.867            | 6.861           | 116.65           | 116.63            | 116.64           |
| trophic<br>carnivore  | 0.0081       | 0.0081        | 0.0081       | 6.612           | 6.641            | 6.724           | 109.67           | 109.68            | 109.67           |
| trophic<br>herbivore  | 0.0071       | 0.0071        | 0.0071       | 6.204           | 6.267            | 6.299           | 99.30            | 99.30             | 99.30            |
| trophic<br>omnivore   | 0.0095       | 0.0096        | 0.0095       | 7.34            | 7.435            | 7.462           | 119.74           | 119.74            | 119.74           |



**table S8. Output values of FE simulations in the “masseter-driven” analysis.** Abbreviations as in Table S7.

|                       | hi raw<br>SE | med raw<br>SE | lo raw<br>SE | hi VM<br>stress | med VM<br>stress | lo VM<br>stress | hi bite<br>force | med bite<br>force | lo bite<br>force |
|-----------------------|--------------|---------------|--------------|-----------------|------------------|-----------------|------------------|-------------------|------------------|
| cs large              | 0.0409       | 0.0370        | 0.0367       | 15.515          | 15.548           | 15.800          | 132.71           | 132.72            | 132.72           |
| cs small              | 0.0359       | 0.0357        | 0.0358       | 16.646          | 16.995           | 17.109          | 124.23           | 124.24            | 124.22           |
| diet broad            | 0.0355       | 0.0358        | 0.0358       | 16.351          | 16.715           | 16.918          | 119.91           | 119.90            | 119.90           |
| diet narrow           | 0.0407       | 0.0408        | 0.0405       | 16.648          | 16.592           | 16.637          | 120.23           | 120.23            | 120.23           |
| maturity early        | 0.0374       | 0.0375        | 0.0374       | 16.469          | 16.619           | 16.624          | 134.91           | 134.93            | 134.93           |
| maturity late         | 0.0348       | 0.0349        | 0.0350       | 16.317          | 16.370           | 16.486          | 135.92           | 135.90            | 135.91           |
| precipitation<br>high | 0.0357       | 0.0355        | 0.0362       | 16.881          | 17.049           | 17.345          | 104.96           | 104.97            | 104.96           |
| precipitation low     | 0.0360       | 0.0353        | 0.0353       | 15.419          | 15.248           | 15.284          | 115.34           | 115.32            | 115.33           |
| trophic<br>carnivore  | 0.0399       | 0.0394        | 0.0393       | 16.688          | 16.630           | 16.752          | 114.40           | 114.41            | 114.40           |
| trophic<br>herbivore  | 0.0306       | 0.0306        | 0.0306       | 13.969          | 14.025           | 13.977          | 112.27           | 112.26            | 112.26           |
| trophic<br>omnivore   | 0.0395       | 0.0394        | 0.0392       | 17.216          | 17.377           | 17.554          | 110.18           | 110.18            | 110.18           |

**table S9. List of the highest mechanical demands from food items experienced by each carnivoran species, ranked on the basis of stiffness and density.**

| Taxon                             | Mechanical Demand*  | Category† |
|-----------------------------------|---------------------|-----------|
| <i>Acinonyx_jubatus</i>           | Killing Large Prey  | High      |
| <i>Ailuropoda_melanoleuca</i>     | Bamboo              | High      |
| <i>Ailurus_fulgens</i>            | Bamboo              | High      |
| <i>Aonyx_capensis</i>             | Crab                | High      |
| <i>Arctonyx_collaris</i>          | Small mammals       | Low       |
| <i>Atilax_paludinosus</i>         | Crab                | High      |
| <i>Bassariscus_astutus</i>        | Arthropods          | Low       |
| <i>Callorhinus_ursinus</i>        | Fish                | Low       |
| <i>Canis_lupus</i>                | Killing Large Prey  | High      |
| <i>Canis_mesomelas</i>            | Carcass Soft Tissue | Low       |
| <i>Civettictis_civetta</i>        | Crab                | High      |
| <i>Crocuta_crocuta</i>            | Bone                | High      |
| <i>Cryptoprocta_ferox</i>         | Killing Large Prey  | High      |
| <i>Cynogale_bennetti</i>          | Shelled inverts     | High      |
| <i>Eira_barbara</i>               | Small mammals       | Low       |
| <i>Enhydra_lutris</i>             | Shelled inverts     | High      |
| <i>Erignathus_barbatus</i>        | Shelled inverts     | High      |
| <i>Eupleres_goudoti</i>           | Worms               | Low       |
| <i>Felis_silvestris</i>           | Killing Large Prey  | High      |
| <i>Fossa_fossa</i>                | Small mammals       | Low       |
| <i>Galidictis_fasciata</i>        | Small mammals       | Low       |
| <i>Genetta_piscivora</i>          | Fish                | Low       |
| <i>Gulo_gulo</i>                  | Killing Large Prey  | High      |
| <i>Herpestes_javanicus</i>        | Insects             | Low       |
| <i>Hydrurga_leptonyx</i>          | Krill               | Low       |
| <i>Lontra_canadensis</i>          | Fish                | Low       |
| <i>Lutra_lutra</i>                | Shelled inverts     | High      |
| <i>Lycaon_pictus</i>              | Killing Large Prey  | High      |
| <i>Mellivora_capensis</i>         | Killing Large Prey  | High      |
| <i>Mephitis_mephitis</i>          | Small insects       | Low       |
| <i>Mungos_mungo</i>               | Small insects       | Low       |
| <i>Mustela_frenata</i>            | Small mammals       | Low       |
| <i>Mydaus_javanensis</i>          | Small insects       | Low       |
| <i>Nandinia_binotata</i>          | Small mammals       | Low       |
| <i>Neofelis_nebulosa</i>          | Killing Large Prey  | High      |
| <i>Odobenus_rosmarus</i>          | Soft inverts        | Low       |
| <i>Panthera_pardus</i>            | Killing Large Prey  | High      |
| <i>Paradoxurus_hermaphroditus</i> | Fruit               | Low       |

**table S9 (continued)**

|                              |                    |      |
|------------------------------|--------------------|------|
| <i>Parahyaena_brunnea</i>    | Bone               | High |
| <i>Phoca_vitulina</i>        | Fish               | Low  |
| <i>Potos_flavus</i>          | Fruit              | Low  |
| <i>Prionodon_linsang</i>     | -                  | -    |
| <i>Procyon_lotor</i>         | Small mammals      | Low  |
| <i>Proteles_cristata</i>     | Soft inverts       | Low  |
| <i>Spilogale_putorius</i>    | Small mammals      | Low  |
| <i>Suricata_suricata</i>     | Insects            | Low  |
| <i>Taxidea_taxus</i>         | Small mammals      | Low  |
| <i>Tremarctos_ornatus</i>    | Bamboo             | High |
| <i>Ursus_arctos</i>          | Killing Large Prey | High |
| <i>Ursus_maritimus</i>       | Seals              | Low  |
| <i>Viverra_tangalunga</i>    | Small mammals      | Low  |
| <i>Vulpes_vulpes</i>         | Small mammals      | Low  |
| <i>Zalophus_californicus</i> | Fish               | Low  |

---

\*Dietary and behavior observations are derived from Mammalian Species publications of the respective species and Animal Diversity Web (<http://animaldiversity.org/>, accessed 30 January 2017)

†Categorization based on relative Young's Modulus and density values reported in Chen *et al.* (47)

**A**

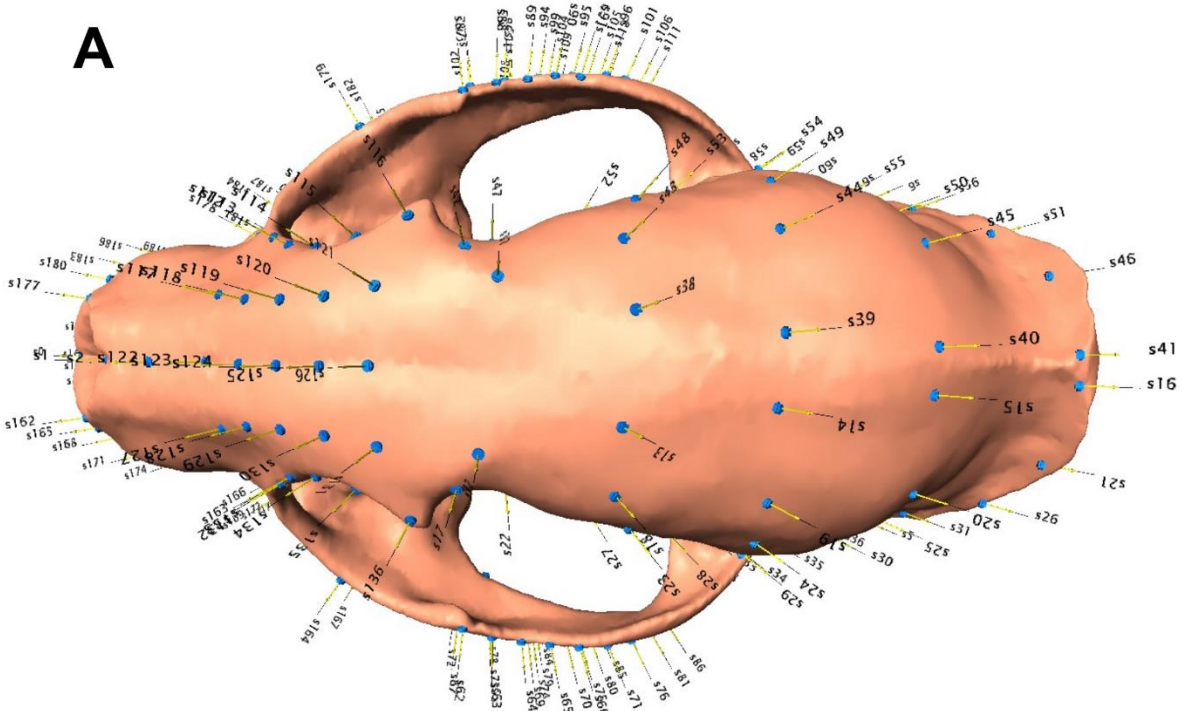

**B**

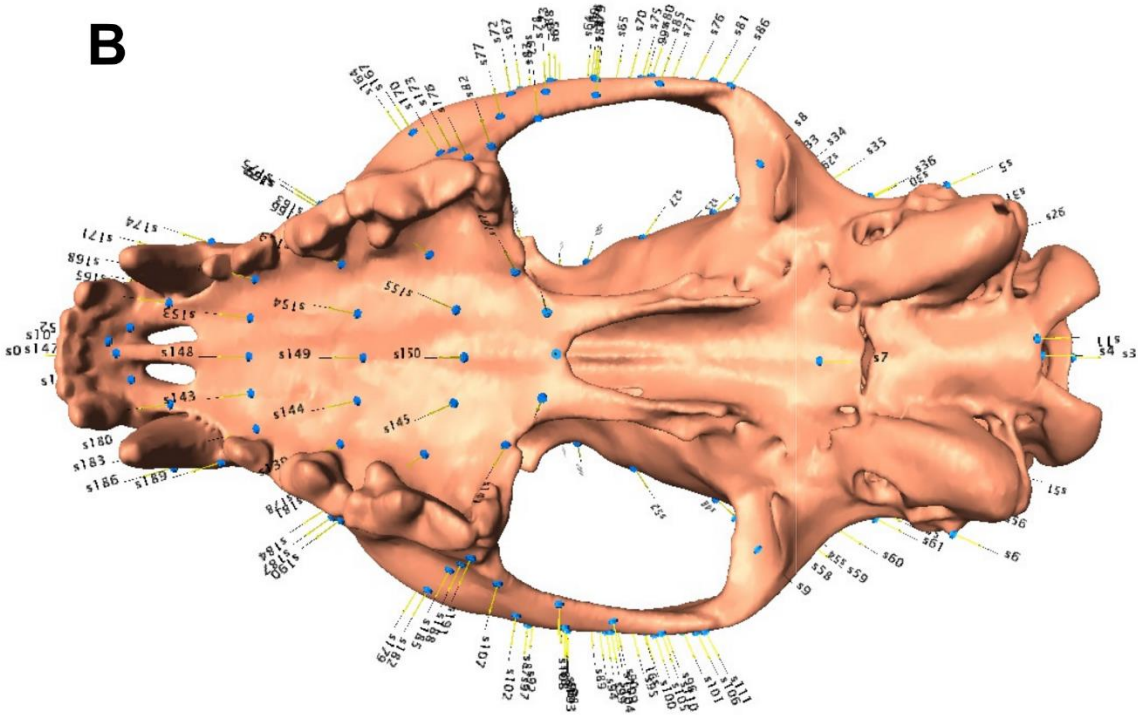

Figure S1. (continued)

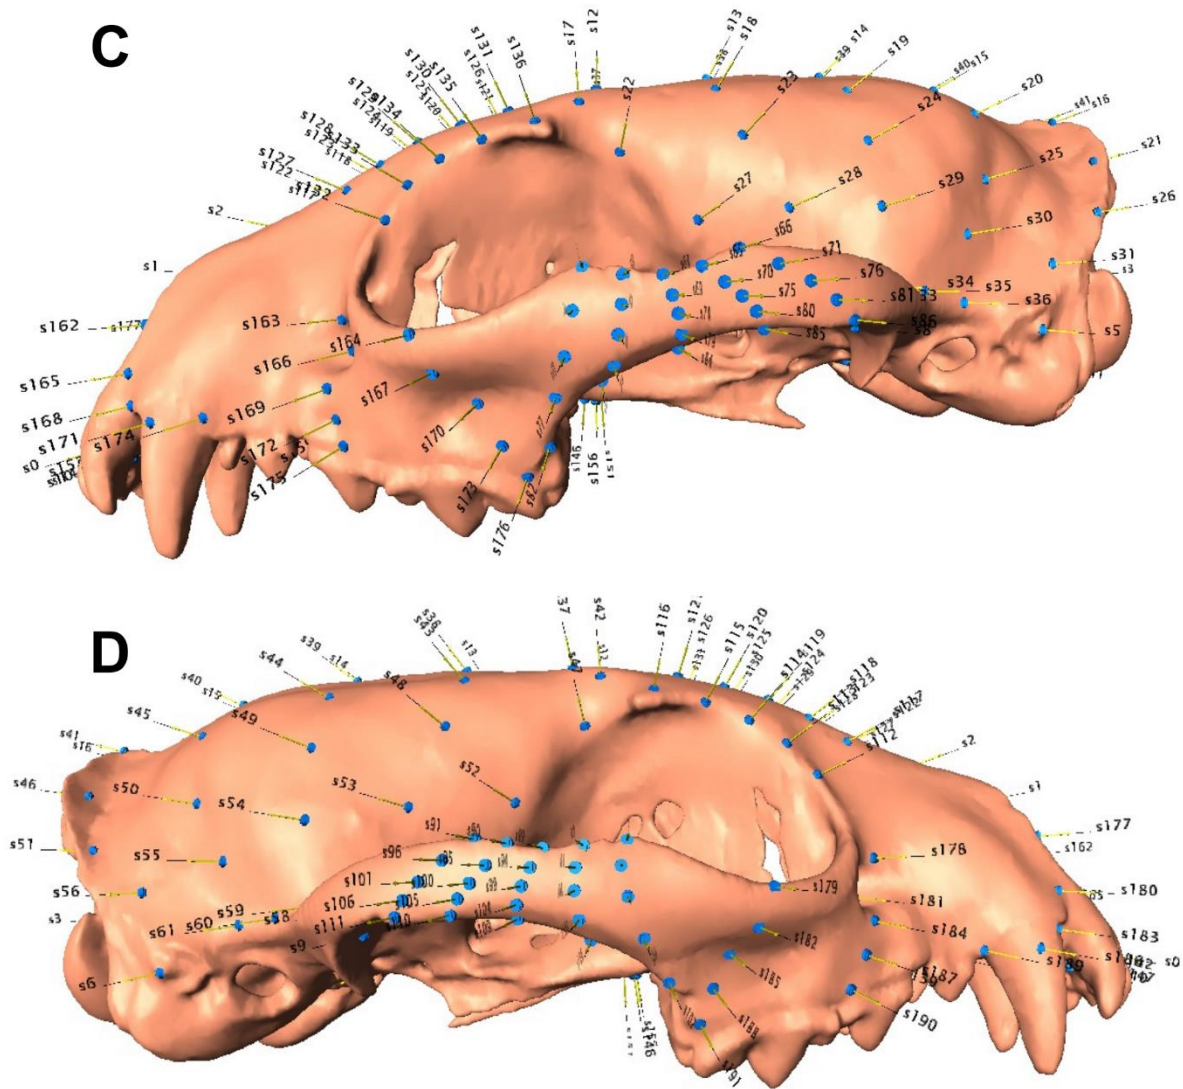

**fig. S1. Anatomical landmarks used in the GMM analyses. A. Dorsal view. B. Ventral view. C. Left lateral view. D. Right lateral view. Note that landmark labels start with s0 and end with s189.**

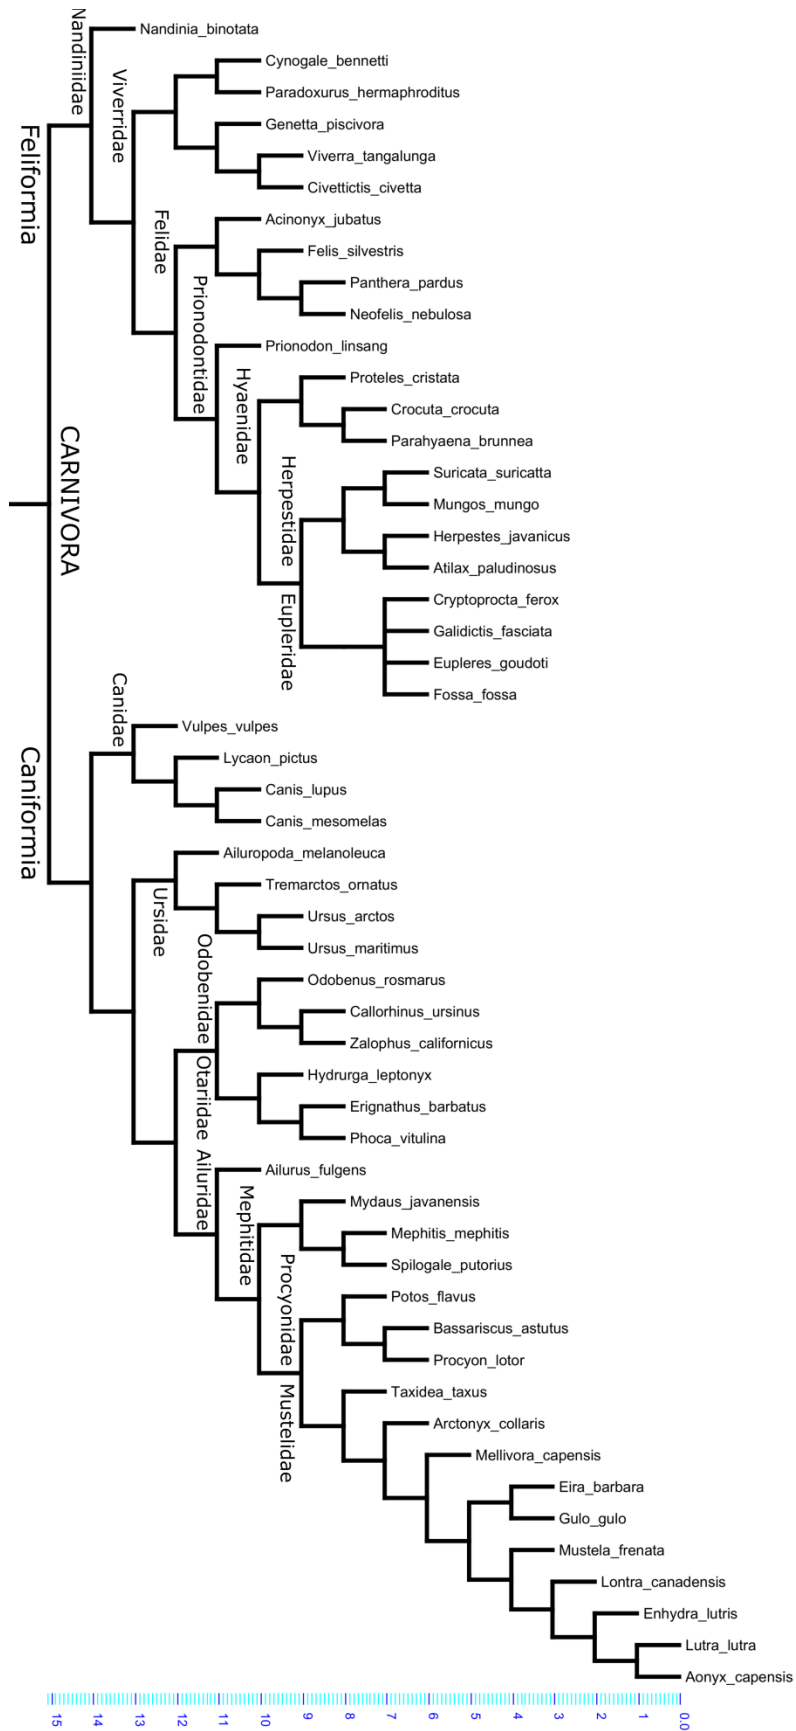

**fig. S2. Main analysis.** Based on tree topology of (61); uniform branch lengths. Scale is in arbitrary branch length units of one.

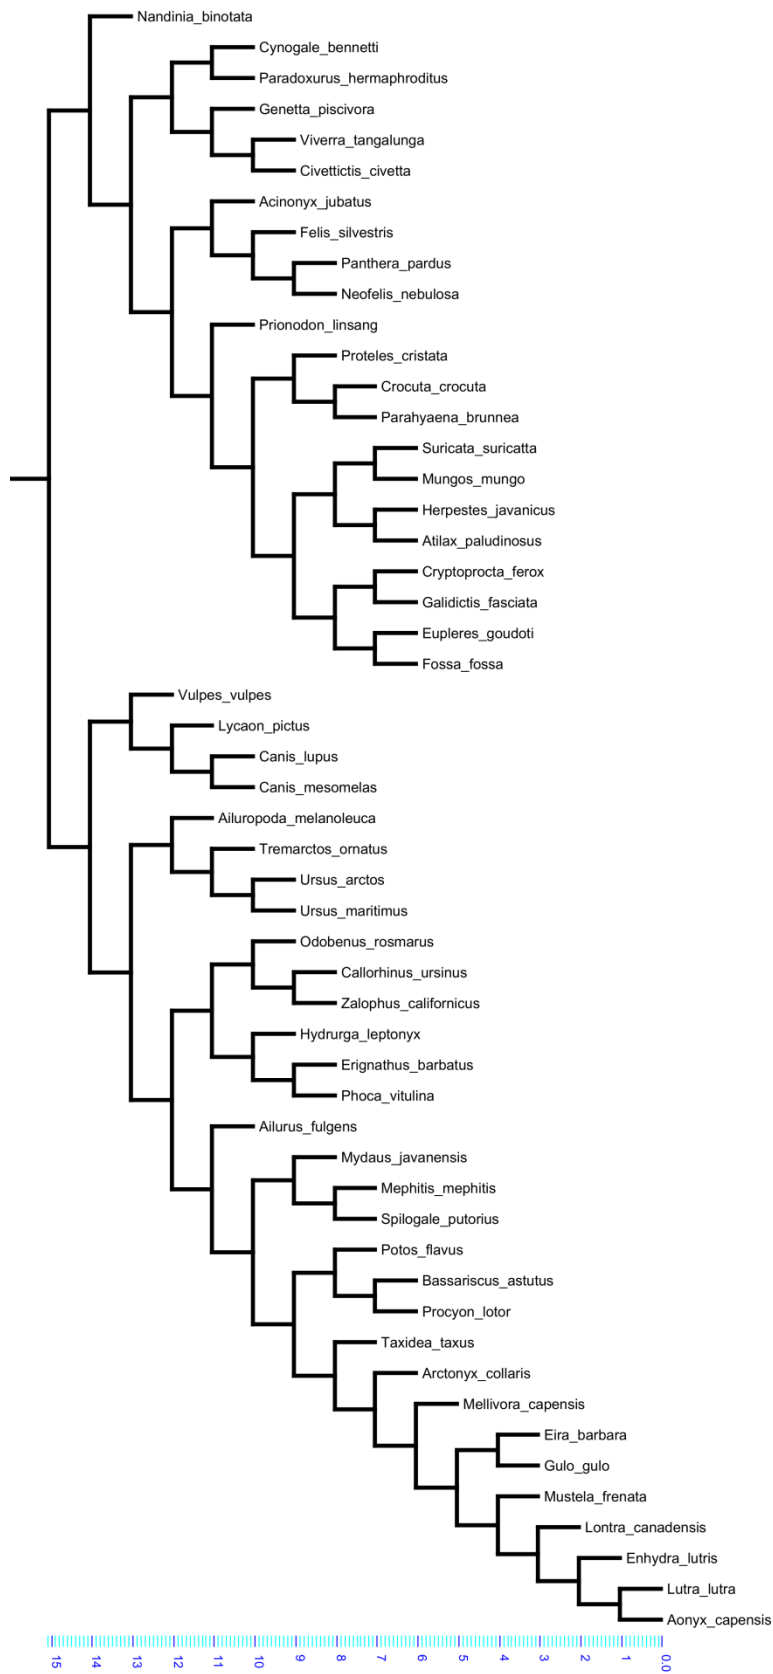

**fig. S3. Sensitivity analysis 1.** Tree topology as in Main Analysis, but with euplerid polytomy resolved according to (69); uniform branch lengths. Scale is in arbitrary branch length units of one.

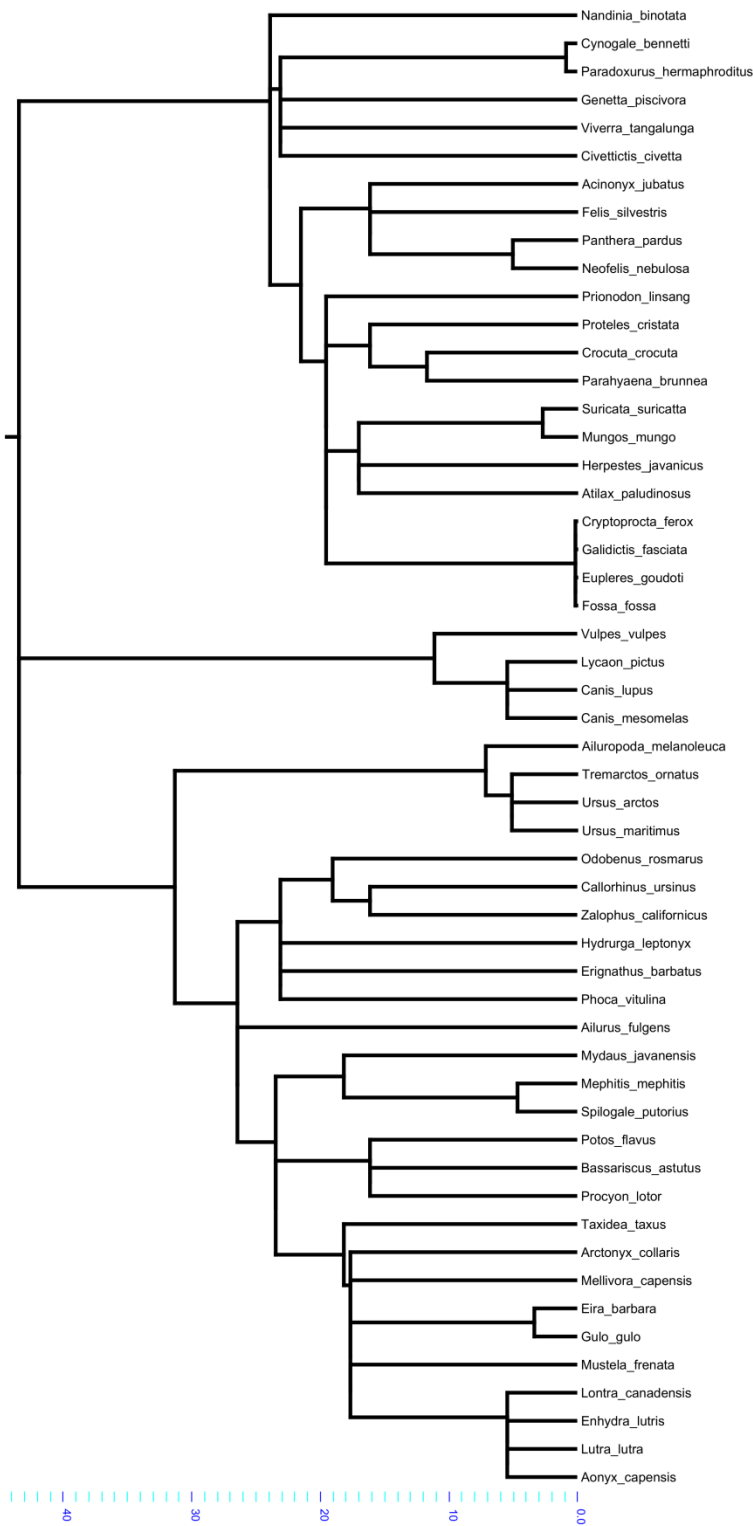

**fig. S4. Sensitivity analysis 2.** Tree topology as in Main Analysis; fossil calibrations and branch lengths using data from (62), unpublished data from JJF and J. Finarelli, and PBDB (Paleobiology Database) (71); no age/node interpolations, so contains some zero branch lengths (same estimated divergence ages at adjacent nodes, when the oldest age calibration fossils for a clade occur in later-diverging nodes/lineages; all other nodes collapsed to the nearest older node with a fossil calibration age). Branch lengths and scale in millions of years (Ma, megannum).



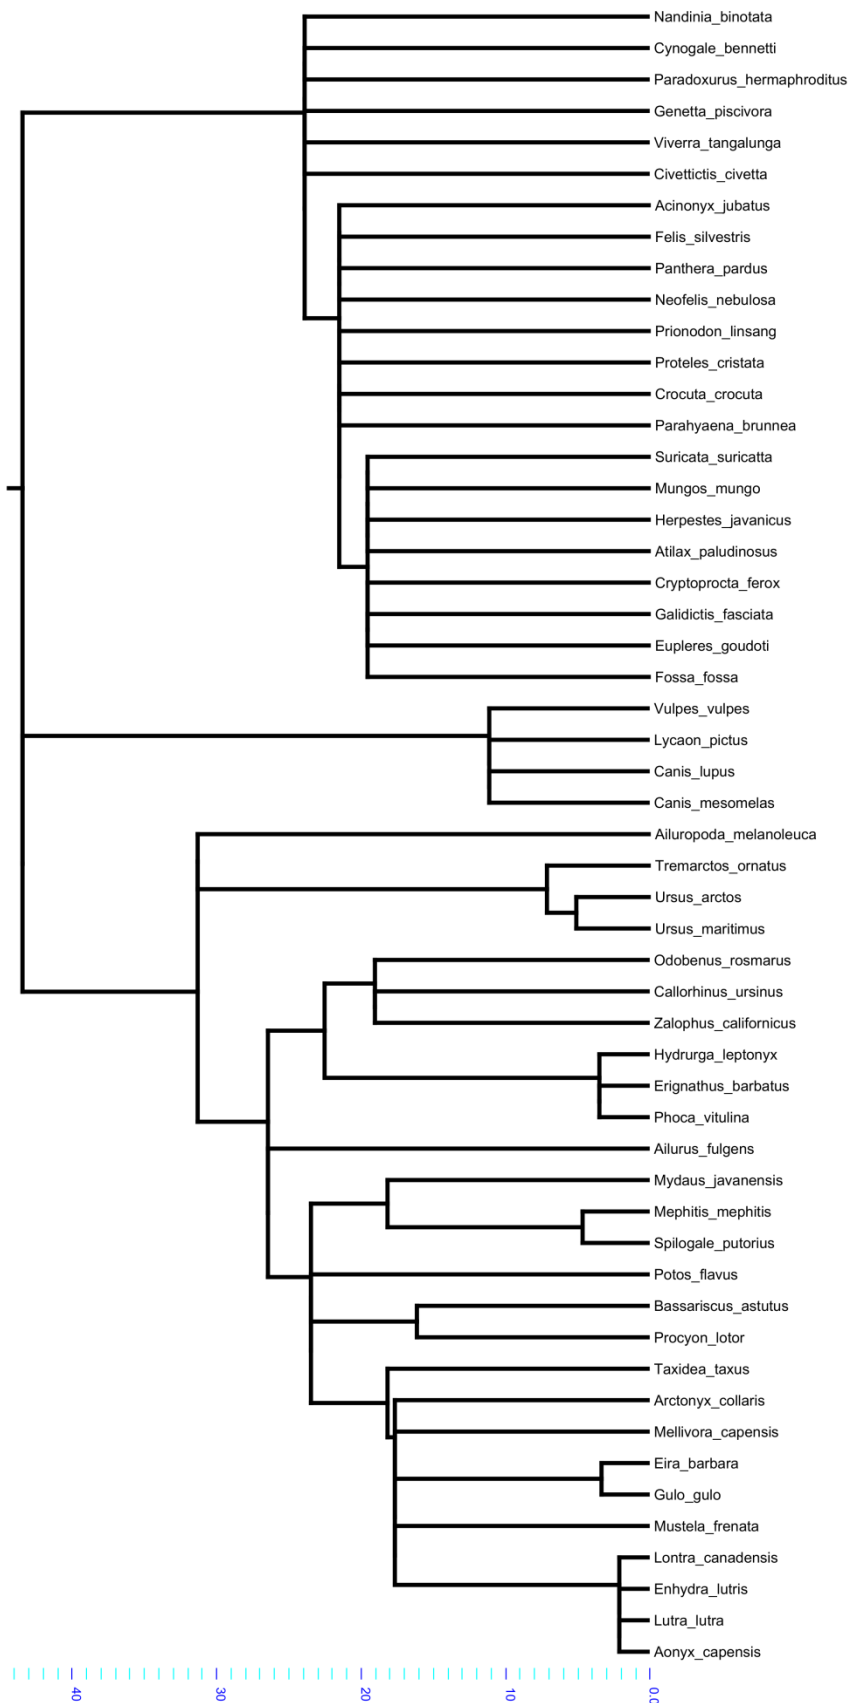

**fig. S5. Sensitivity analysis 3.** As in Sensitivity Analysis 2, but without PBDB node calibration data; no age/node interpolation, so contains some zero branch lengths. Branch lengths and scale in millions of years (Ma, megannum).

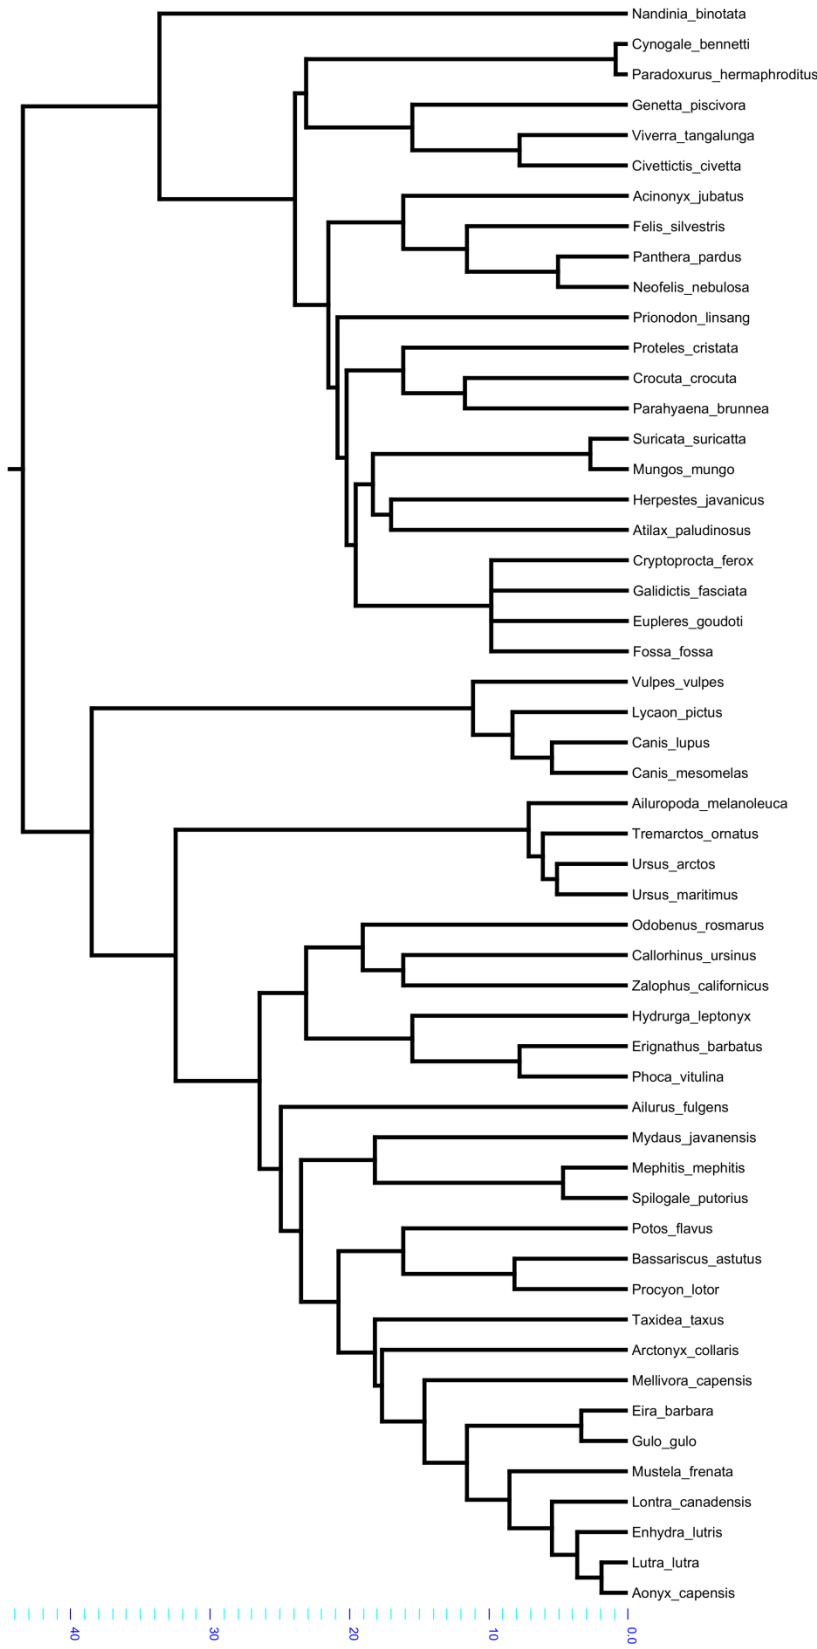

**fig. S6. Sensitivity analysis 4.** As in Sensitivity Analysis 2, but with age/node interpolations (expanded by interpolating node ages in equal intervals along the branches between nodes previously having the same fossil-calibration ages, using the oldest and youngest bracketing ages). Branch lengths and scale in millions of years (Ma, megannum).

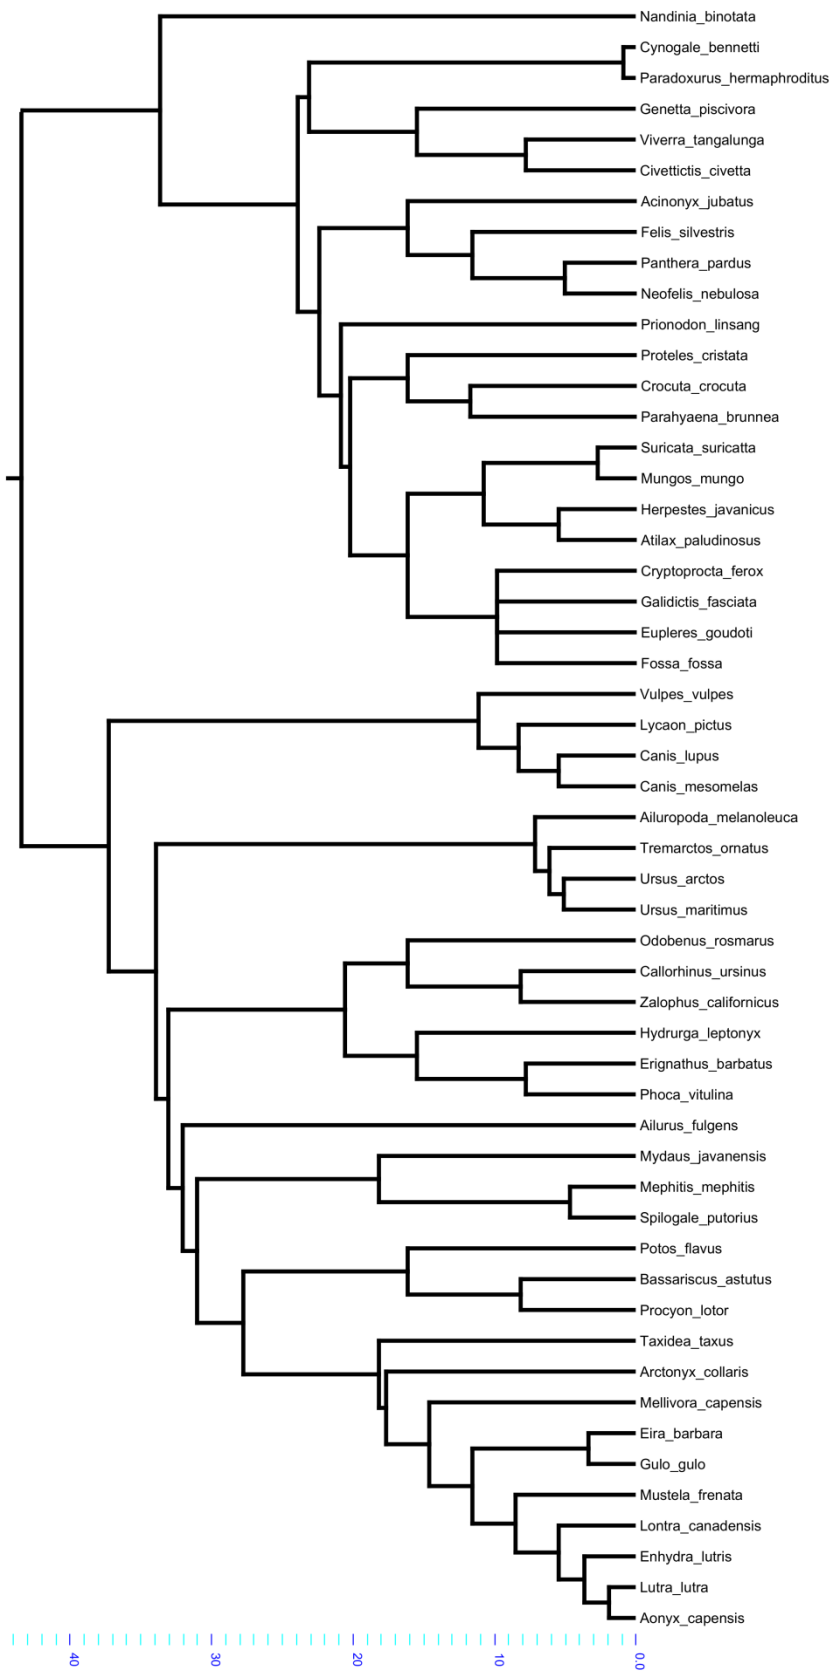

**fig. S7. Sensitivity analysis 5.** As in Sensitivity Analysis 2, adding Meredith *et al.* (70) fossil calibrations (with priority to those, if in conflict with calibrations used in Sensitivity Analysis 2); with age/node interpolations. Branch lengths and scale in millions of years (Ma, megannum).

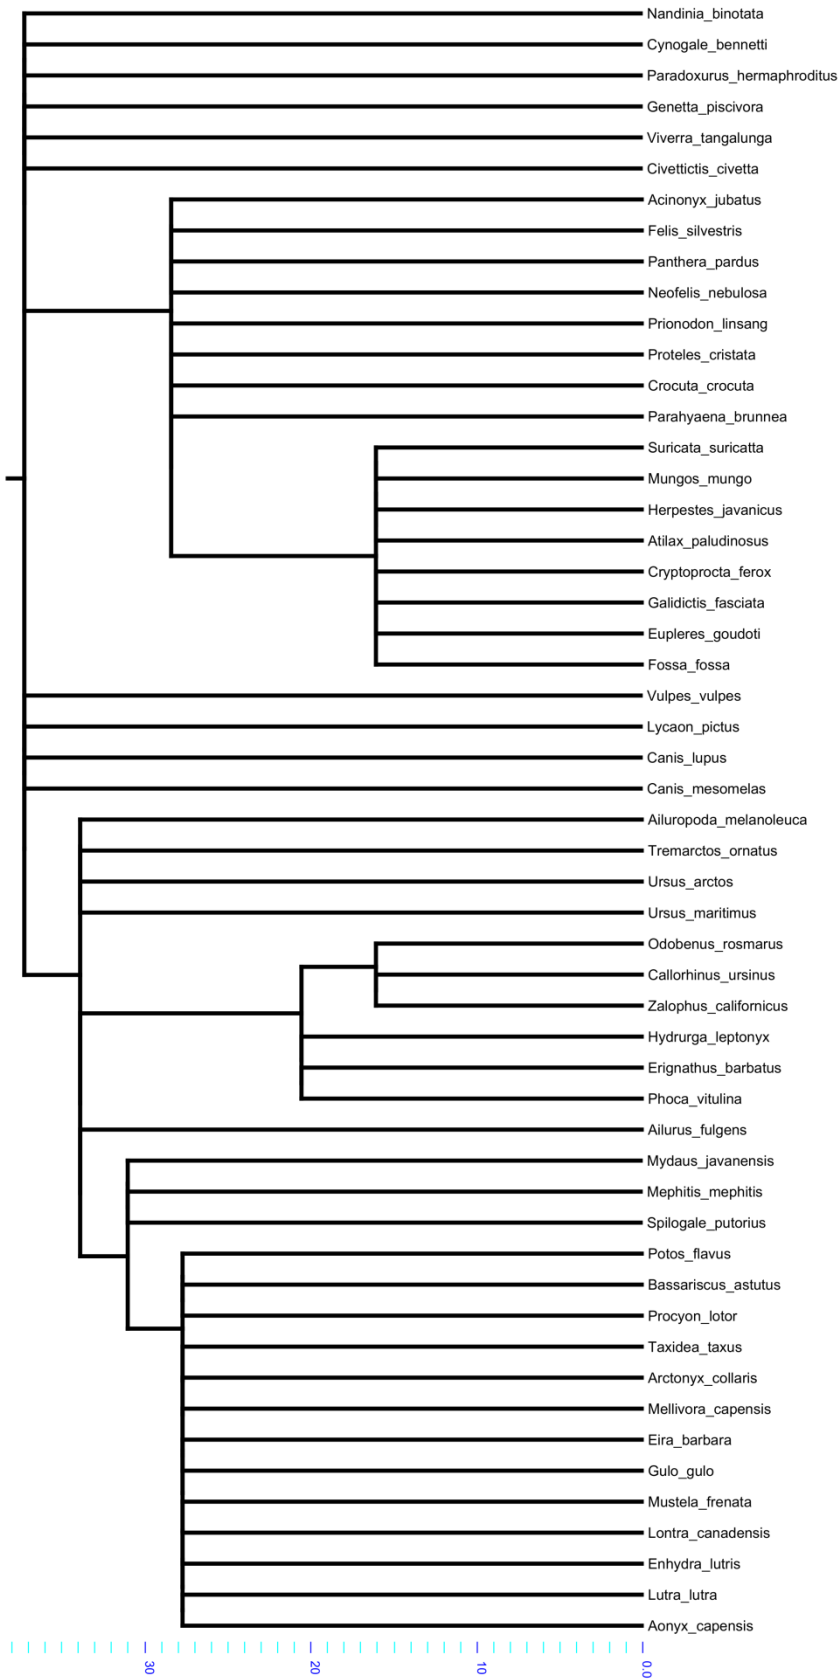

**fig. S8. Sensitivity analysis 6.** Main Analysis tree topology; only Meredith *et al.* fossil calibrations; no age/node interpolations. Branch lengths and scale in millions of years (Ma, megannum).

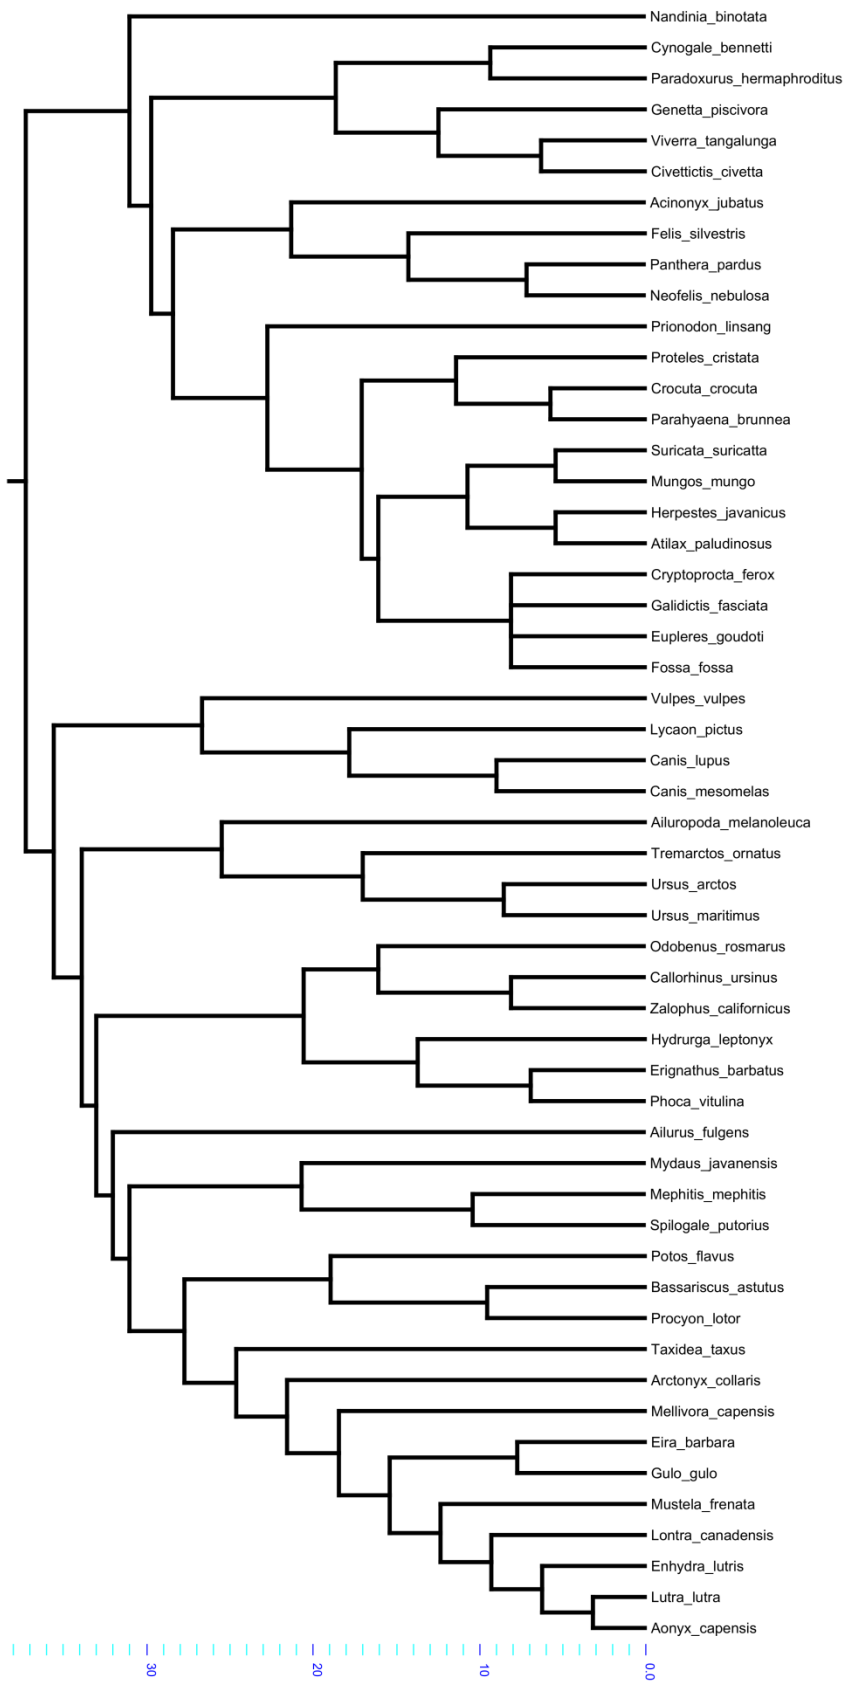

**fig. S9. Sensitivity analysis 7.** Main Analysis tree topology; only Meredith *et al.* fossil calibrations; with age/node interpolations. Branch lengths and scale in millions of years (Ma, megannum).

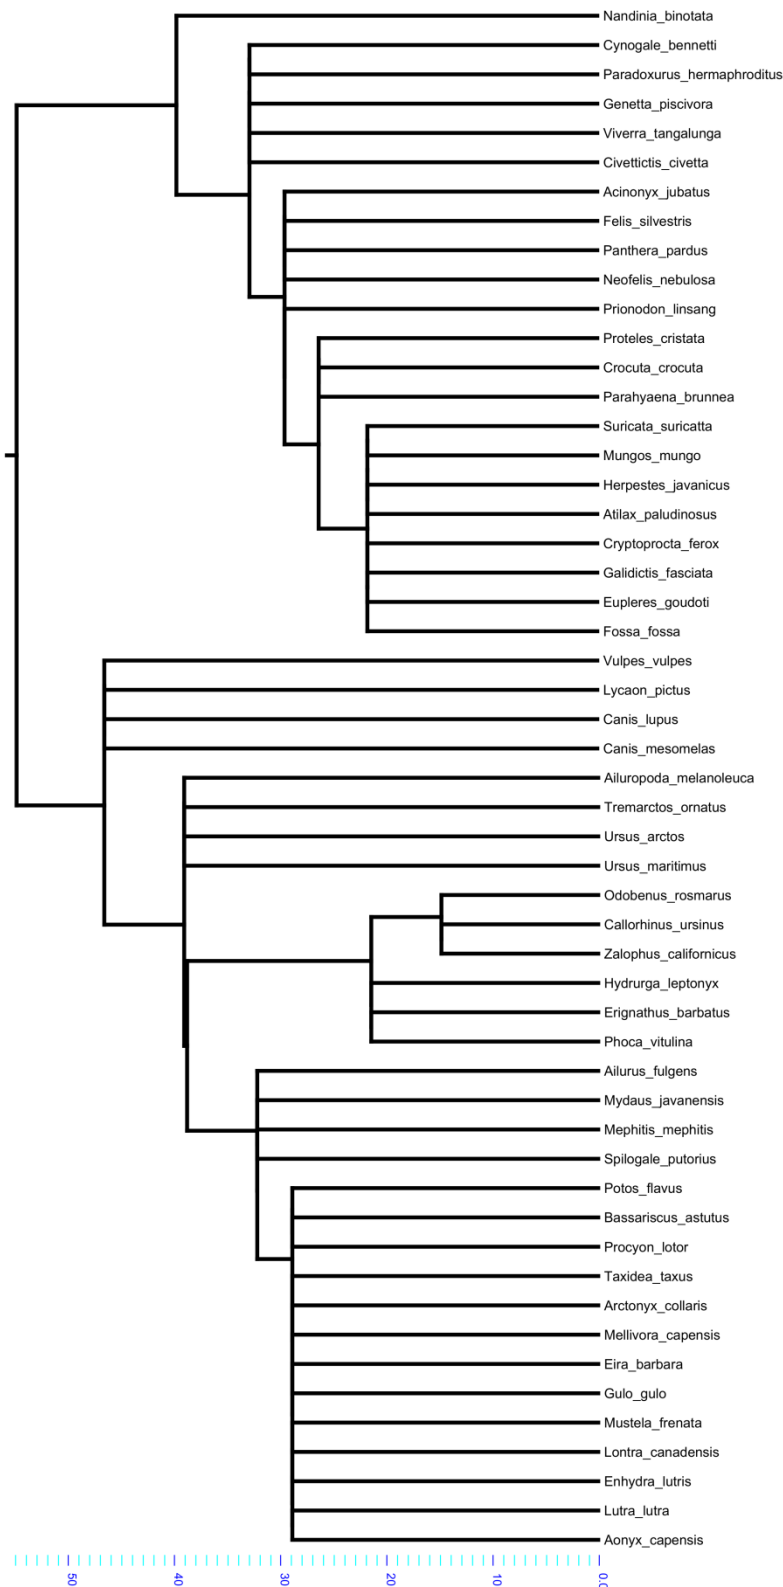

**fig. S10. Sensitivity analysis 8.** Main Analysis tree topology; only Meredith *et al.* interfamilial molecular clock node age estimates (no direct fossil calibrations, although the Meredith *et al.* clock estimates rely on various fossil calibrations to derive the tree-wide nodal age estimates); no age/node interpolations. Branch lengths and scale in millions of years (Ma, megannum).

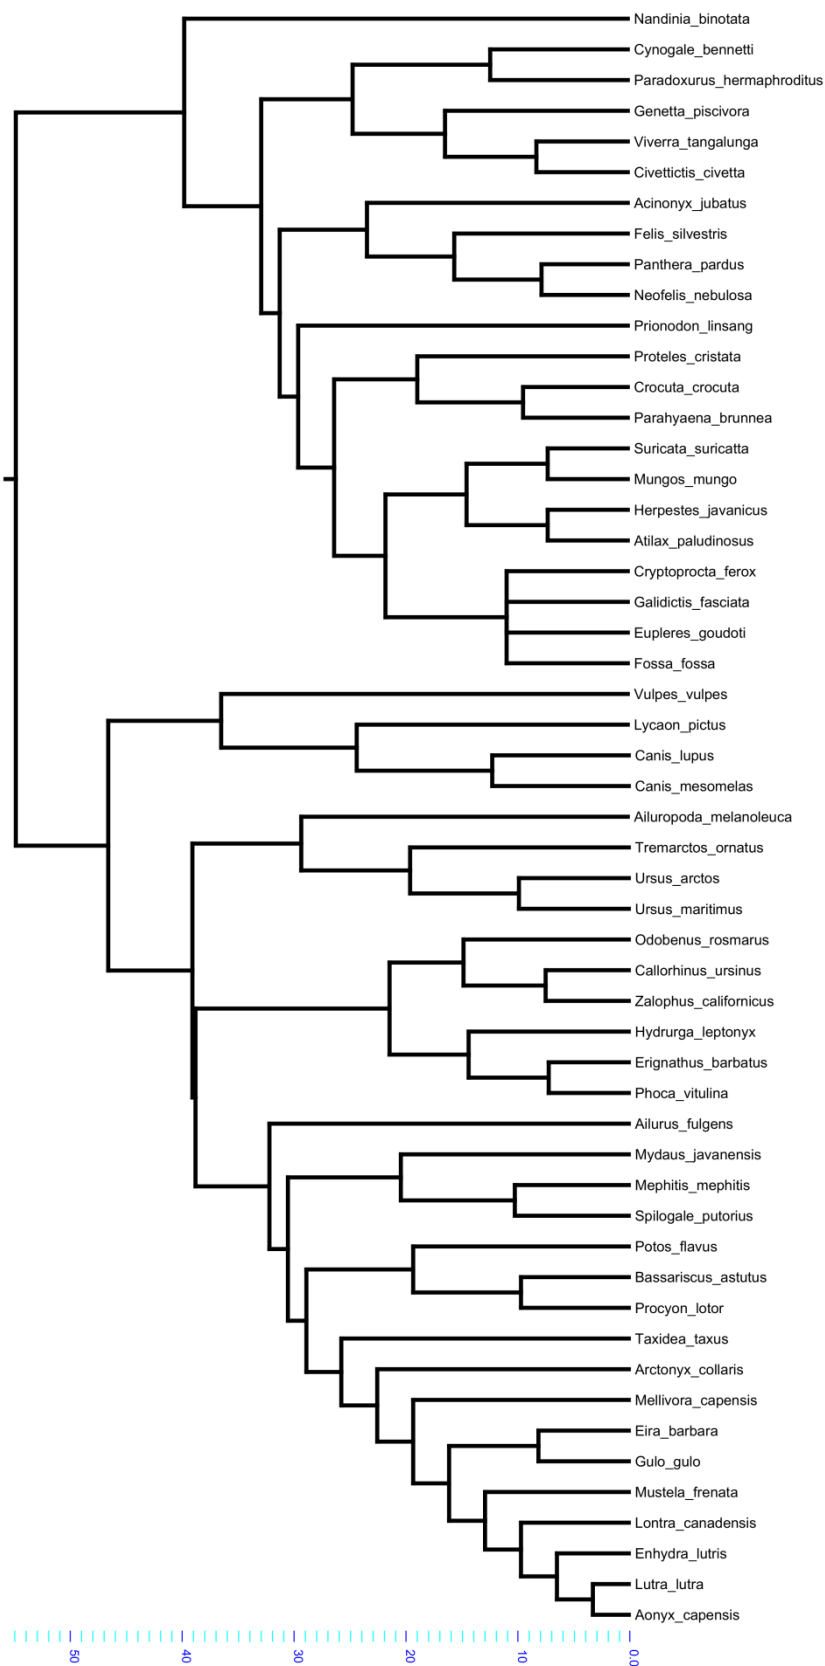

**fig. S11. Sensitivity analysis 9.** Main Analysis tree topology; only Meredith *et al.* interfamilial molecular clock node age estimates; with age/node interpolations. Branch lengths and scale in millions of years (Ma, megannum).

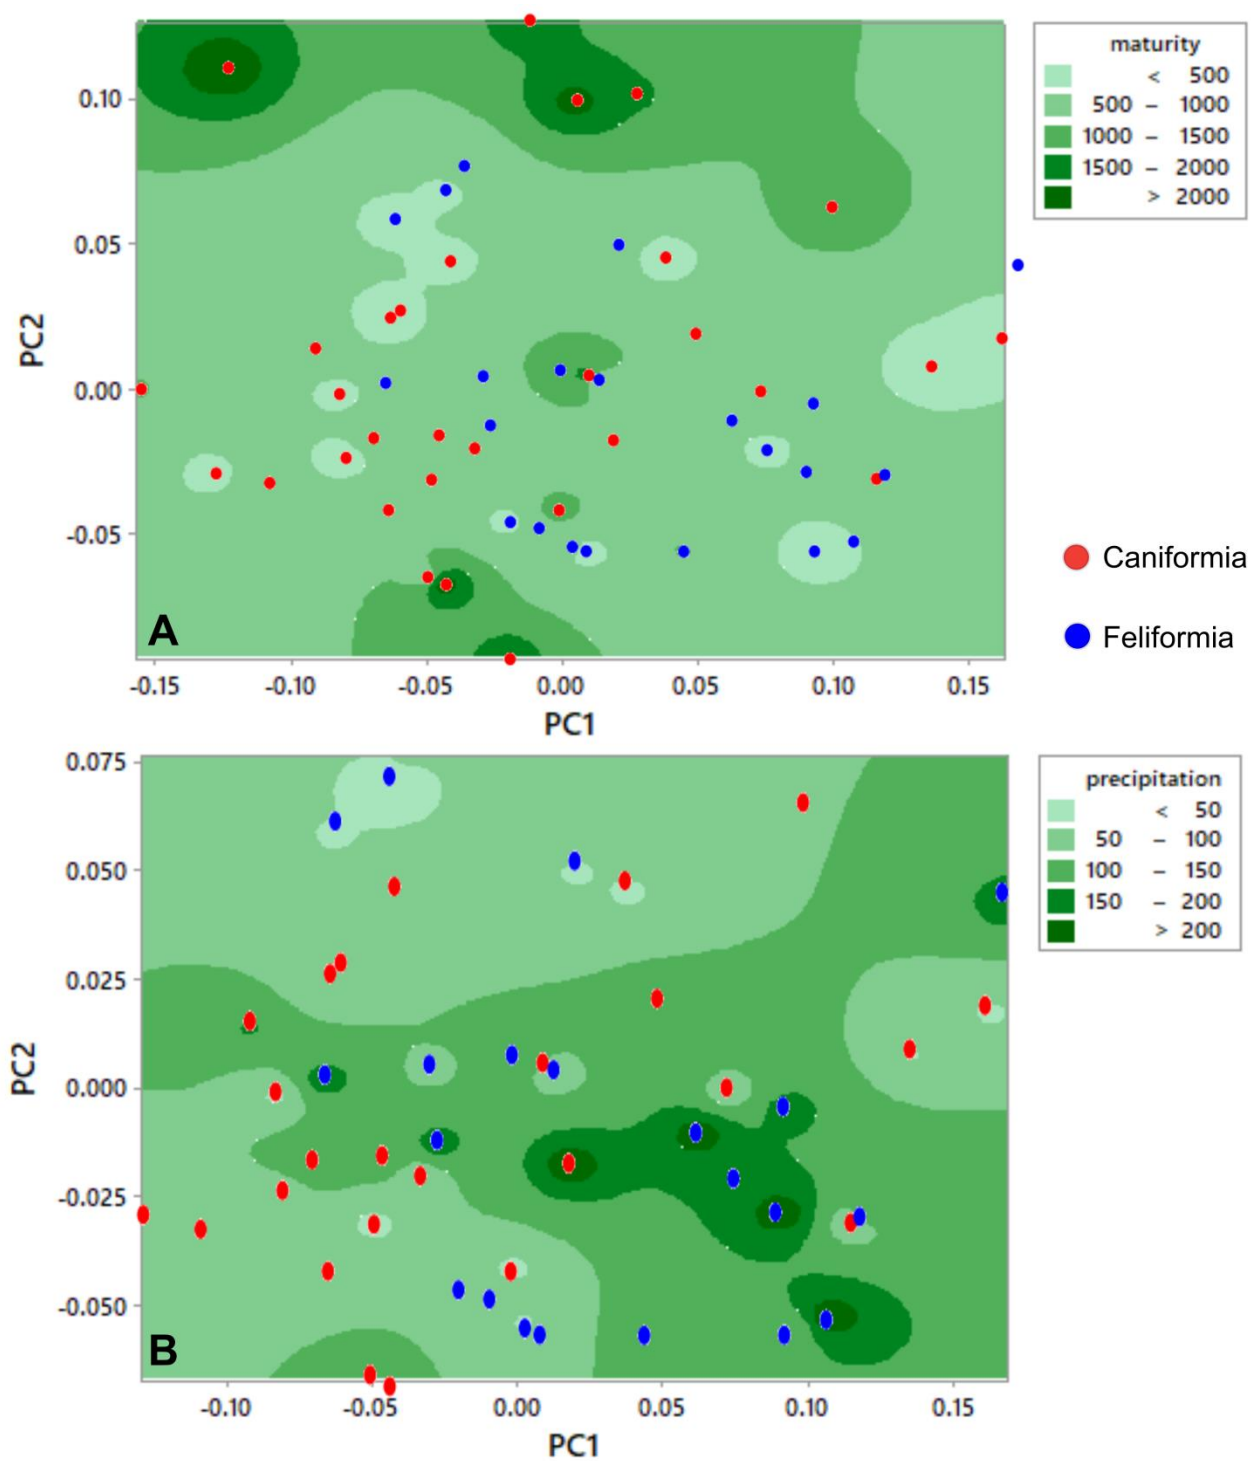

**fig. S12. Contour plot of the first two PC axes against life history and environmental variables. A.** Cranial shape PC scores superimposed on age at sexual maturity contour. **B.** Cranial shape PC scores superimposed on mean monthly precipitation.



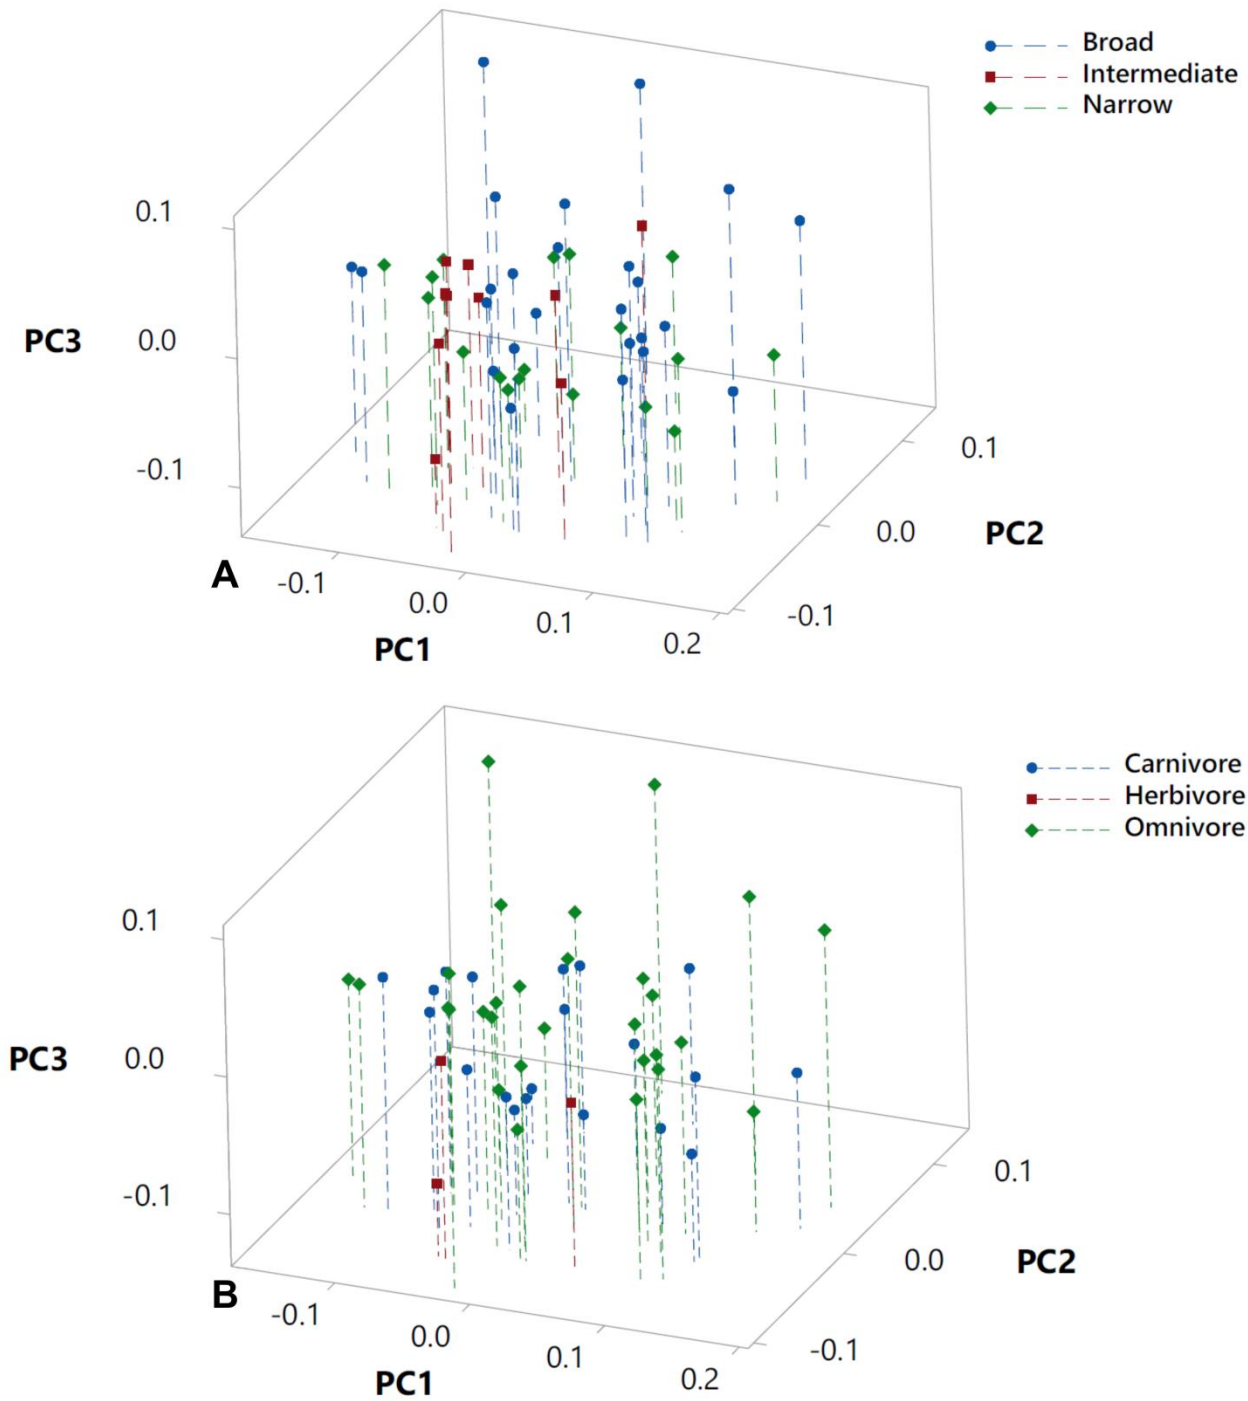

**fig. S13. 3D plots of PC scores of cranial shape data. A.** Data points color-coded by dietary breadth (blue= broad, red= intermediate, green= narrow). **B.** Data points color-coded by trophic level (blue= carnivore, red= herbivore, green= omnivore).

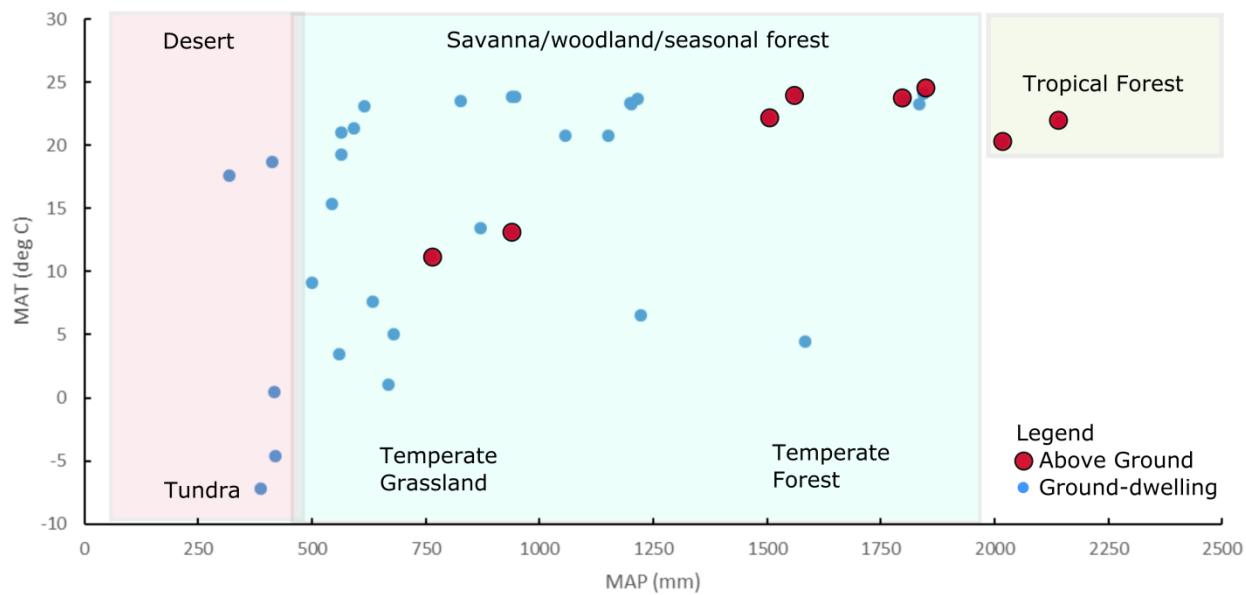

**fig. S14. Plot of mean annual precipitation versus mean annual temperature of species studied.** Data from the PanTHERIA database (28) and estimated biome coverage from (72). Terrestriality categories of the carnivorous species studied are color coded (red= above ground/arboreal, blue= ground-dwelling/terrestrial).
